# Supplementary material for: Impact of high atmospheric carbon dioxide on the biotic stress response of the model cereal species Brachypodium distachyon
Source: Front Plant Sci. 2023 Aug 16;14:1237054. doi: 10.3389/fpls.2023.1237054 (PMC10469009; doi:10.3389/fpls.2023.1237054)
Supplement: Supplementary file 2 [file Table_1.xlsx]

## Sheet: Table S1
Table S1. Primers characteristics
Organism	Gene	Primer name	Forward(F)/	Sequence	Comment	Reference
			Reverse(R)
B. distachyon	UBC18 (ubiquitin-conjugating enzyme 18)	Bd_UBC18For	F	5’-ACCCTCTACGCTGGTGAGAC-3’	Plant reference gene	Qi and Yang, 2002
B. distachyon		Bd_UBC18Rev	R	5’-TTGCTGTAAATGTGCGGATG-3’
M. oryzae	28S ribosomal DNA	Mo28S_F	F	5’-TACGAGAGGAACCGCTCATTCAGATAATTA-3’	Fungal reference gene	Hong et al. 2008
M. oryzae		Mo28S_R	R	5’-TCAGCAGATCGTAACGATAAAGCTACTC-3’

## Sheet: Table S2
Table S2. Method used for the clustering step and the corresponding parameter set. For each method, the package used and the reference is detailed.
Method	Abbreviation	R package used	Parameter used	Reference
K-means clustering	Kmeans	stats	nstart=5	(Likas, Vlassis, and J. Verbeek 2003)
Hierarchical clustering	hclust	stats	- method = ward.D2	(Johnson 1967)
			- Dissimilarity matrix = Pearson correlation
Fuzzy clustering	fuzzy_clust	Mfuzz	- m=3,70 determined by the mestimate function	(Ruspini 1970; Kumar and E. Futschik 2007)
Generalized linear model clustering	coseq_clust	coseq	- transformation=arcsin	(Rau et al. 2015; Rau and Maugis-Rabusseau 2018)
			- parallel=TRUE
			- meanFilterCutoff=0
			- normFactors=DESeq
			- GaussianModel = Gaussian_pk_Lk_Bk
Generalized linear model clustering	GLM_clust	DiCoExpress	Default	(Rau et al. 2015; Lambert et al. 2020)

## Sheet: Table S3
Table S3. Enrichment analysis for KEGG pathway and Gene ontology (GO) terms (Biological Process, Molecular Function & Cellular Component). The background used corresponds to the genes sequenced and the p-value cut-off is 0.05 for the Fisher’s exact test.
Enrichment	Cluster	ID	Description	GeneRatio	BgRatio	pvalue	p.adjust	qvalue	geneID	Count
KEGG	3	bdi00900	Terpenoid backbone biosynthesis	04/16	49/3684	4.47315360176313e-05	0.000715704576282101	0.000470858273869803	100821434/100839060/104583049/100830402	4
KEGG	3	bdi00630	Glyoxylate and dicarboxylate metabolism	03/16	51/3684	0.00123305313542087	0.00986442508336694	0.00648975334432036	100845819/100824105/100838923	3
KEGG	5	bdi04016	MAPK signaling pathway - plant	08/23	89/3684	0.000699300604197985	0.00699300604197985	0.00515274129409042	100838452/100845575/100833656	3
KEGG	6	bdi00941	Flavonoid biosynthesis	05/56	21/3684	1.14465269515194e-05	0.000641005509285087	0.00056630185970675	100833073/100839986/100821527/100844617/100841298	5
KEGG	6	bdi00908	Zeatin biosynthesis	04/56	21/3684	0.000236566296034615	0.00626533556384237	0.00553516487783066	100838252/100820995/100825123/100841393	4
KEGG	6	bdi04016	MAPK signaling pathway - plant	07/56	89/3684	0.000335642976634412	0.00626533556384237	0.00553516487783066	100826491/100840003/100822339/100841136/100843567/100824308/100837235	7
KEGG	6	bdi00945	Stilbenoid, diarylheptanoid and gingerol biosynthesis	03/56	12/3684	0.0006643736152612	0.00930123061365679	0.00821725260980957	100833073/100839986/100821527	3
KEGG	6	bdi00196	Photosynthesis - antenna proteins	03/56	17/3684	0.00194562244454574	0.0217909713789123	0.0192514220828737	100836842/100841670/100842091	3
KEGG	9	bdi00196	Photosynthesis - antenna proteins	10/97	17/3684	1.67547655198437e-12	1.08905975878984e-10	9.87649335906578e-11	100822184/100842929/100834994/100838367/100841831/100835853/100830344/100821549/100833322/100828241	10
KEGG	9	bdi00195	Photosynthesis	07/97	36/3684	3.15365990576521e-05	0.00102493946937369	0.00092949976169922	100831679/100824663/100827507/100827920/100827756/100825720/100840579	7
KEGG	9	bdi00940	Phenylpropanoid biosynthesis	11/97	126/3684	0.000393929226626398	0.00853513324357195	0.00774036375125554	100824969/100824165/100832146/100842862/100832790/100845913/100840340/100836460/100841946/100841879/100821663	11
KEGG	9	bdi00860	Porphyrin and chlorophyll metabolism	06/97	41/3684	0.000608699331193394	0.00989136413189265	0.00897030593337633	100829664/100833871/100823044/100821409/100836154/100822302	6
KEGG	9	bdi00910	Nitrogen metabolism	04/97	19/3684	0.00129202043787235	0.0167962656923405	0.0152322409517582	100829419/100827784/100834109/100837442	4
GO - Biological Process	4	GO:0005992	trehalose biosynthetic process	05/92	17/8080	9.52825862100424e-07	0.000111373605371468	0.000103043723529281	Bradi2g19710/Bradi2g49870/Bradi3g35820/Bradi3g53790/Bradi4g41580	5
GO - Biological Process	4	GO:0005991	trehalose metabolic process	05/92	18/8080	1.30747445780468e-06	0.000111373605371468	0.000103043723529281	Bradi2g19710/Bradi2g49870/Bradi3g35820/Bradi3g53790/Bradi4g41580	5
GO - Biological Process	4	GO:0046351	disaccharide biosynthetic process	05/92	19/8080	1.75853061112844e-06	0.000111373605371468	0.000103043723529281	Bradi2g19710/Bradi2g49870/Bradi3g35820/Bradi3g53790/Bradi4g41580	5
GO - Biological Process	4	GO:0009312	oligosaccharide biosynthetic process	05/92	25/8080	7.61281025338952e-06	0.000361608487036002	0.000334562976925276	Bradi2g19710/Bradi2g49870/Bradi3g35820/Bradi3g53790/Bradi4g41580	5
GO - Biological Process	4	GO:0005984	disaccharide metabolic process	05/92	31/8080	2.30680156465247e-05	0.000743484127205702	0.000687877281126605	Bradi2g19710/Bradi2g49870/Bradi3g35820/Bradi3g53790/Bradi4g41580	5
GO - Biological Process	4	GO:0044262	cellular carbohydrate metabolic process	08/92	105/8080	2.34784461222853e-05	0.000743484127205702	0.000687877281126605	Bradi1g33810/Bradi1g37870/Bradi2g19710/Bradi2g49870/Bradi3g34227/Bradi3g35820/Bradi3g53790/Bradi4g41580	8
GO - Biological Process	4	GO:0009311	oligosaccharide metabolic process	05/92	37/8080	5.60763799315781e-05	0.00152207316957141	0.00140823390204114	Bradi2g19710/Bradi2g49870/Bradi3g35820/Bradi3g53790/Bradi4g41580	5
GO - Biological Process	4	GO:0005975	carbohydrate metabolic process	15/92	490/8080	0.000382025375497519	0.00907310266806608	0.00839450496159023	Bradi1g17200/Bradi1g33810/Bradi1g37870/Bradi1g47760/Bradi2g19710/Bradi2g27140/Bradi2g49870/Bradi3g05767/Bradi3g34227/Bradi3g35820/Bradi3g53790/Bradi3g54370/Bradi4g33660/Bradi4g41580/Bradi5g20770	15
GO - Biological Process	4	GO:0034637	cellular carbohydrate biosynthetic process	05/92	63/8080	0.000716473388239514	0.0151255493072786	0.0139942755363741	Bradi2g19710/Bradi2g49870/Bradi3g35820/Bradi3g53790/Bradi4g41580	5
GO - Biological Process	4	GO:0016051	carbohydrate biosynthetic process	05/92	75/8080	0.00158072172892115	0.0300337128495019	0.0277874240768245	Bradi2g19710/Bradi2g49870/Bradi3g35820/Bradi3g53790/Bradi4g41580	5
GO - Biological Process	6	GO:0000041	transition metal ion transport	5/165	17/8080	1.6955077343093e-05	0.00405226348499923	0.00381935426465464	Bradi1g37667/Bradi1g53680/Bradi2g22520/Bradi2g22530/Bradi3g17900	5
GO - Biological Process	9	GO:0009765	photosynthesis, light harvesting	10/209	18/8080	3.95473768160778e-12	1.20619499289037e-09	1.03655756075825e-09	Bradi1g12130/Bradi1g15290/Bradi1g24870/Bradi1g42670/Bradi2g16290/Bradi3g07190/Bradi3g36760/Bradi4g21170/Bradi4g30060/Bradi4g37210	10
GO - Biological Process	9	GO:0019684	photosynthesis, light reaction	12/209	34/8080	2.17741614767364e-11	3.05639748614114e-09	2.6265503849841e-09	Bradi1g12130/Bradi1g15290/Bradi1g24870/Bradi1g42670/Bradi1g56580/Bradi1g63300/Bradi2g16290/Bradi3g07190/Bradi3g36760/Bradi4g21170/Bradi4g30060/Bradi4g37210	12
GO - Biological Process	9	GO:0015979	photosynthesis	17/209	84/8080	3.00629260931915e-11	3.05639748614114e-09	2.6265503849841e-09	Bradi1g06890/Bradi1g12130/Bradi1g15290/Bradi1g18050/Bradi1g24870/Bradi1g42670/Bradi1g56580/Bradi1g63300/Bradi2g15307/Bradi2g16290/Bradi2g59950/Bradi3g07190/Bradi3g36760/Bradi3g59430/Bradi4g21170/Bradi4g30060/Bradi4g37210	17
GO - Biological Process	9	GO:0006091	generation of precursor metabolites and energy	16/209	140/8080	5.70233211121441e-07	4.34802823480099e-05	3.73652814655892e-05	Bradi1g12130/Bradi1g15290/Bradi1g24870/Bradi1g39167/Bradi1g42670/Bradi1g51540/Bradi1g56580/Bradi1g63300/Bradi2g16290/Bradi3g07190/Bradi3g22340/Bradi3g36760/Bradi4g21170/Bradi4g27570/Bradi4g30060/Bradi4g37210	16
GO - Biological Process	9	GO:0043436	oxoacid metabolic process	27/209	452/8080	3.6975374327761e-05	0.00210992904472767	0.00181319182791092	Bradi1g01800/Bradi1g17090/Bradi1g21330/Bradi1g26530/Bradi1g39167/Bradi1g44020/Bradi1g50067/Bradi1g51540/Bradi1g68807/Bradi1g74590/Bradi1g76870/Bradi2g05620/Bradi2g20447/Bradi2g33450/Bradi2g54920/Bradi3g06350/Bradi3g22340/Bradi3g37240/Bradi3g37940/Bradi3g49260/Bradi3g57680/Bradi4g14937/Bradi4g23800/Bradi4g30750/Bradi5g17650/Bradi5g19130/Bradi5g21770	27
GO - Biological Process	9	GO:0006082	organic acid metabolic process	27/209	455/8080	4.15068008798886e-05	0.00210992904472767	0.00181319182791092	Bradi1g01800/Bradi1g17090/Bradi1g21330/Bradi1g26530/Bradi1g39167/Bradi1g44020/Bradi1g50067/Bradi1g51540/Bradi1g68807/Bradi1g74590/Bradi1g76870/Bradi2g05620/Bradi2g20447/Bradi2g33450/Bradi2g54920/Bradi3g06350/Bradi3g22340/Bradi3g37240/Bradi3g37940/Bradi3g49260/Bradi3g57680/Bradi4g14937/Bradi4g23800/Bradi4g30750/Bradi5g17650/Bradi5g19130/Bradi5g21770	27
GO - Biological Process	9	GO:0044283	small molecule biosynthetic process	19/209	298/8080	0.000247635248608112	0.0107898215464963	0.00927235742908572	Bradi1g01800/Bradi1g17090/Bradi1g21330/Bradi1g26530/Bradi1g44020/Bradi1g51540/Bradi1g59870/Bradi1g71667/Bradi1g74590/Bradi1g76870/Bradi2g54920/Bradi2g60926/Bradi3g22340/Bradi3g37240/Bradi4g14937/Bradi4g23800/Bradi4g30750/Bradi5g17650/Bradi5g19130	19
GO - Biological Process	9	GO:0046394	carboxylic acid biosynthetic process	16/209	239/8080	0.000451215515909223	0.0155852632182046	0.0133933754662052	Bradi1g01800/Bradi1g17090/Bradi1g21330/Bradi1g26530/Bradi1g44020/Bradi1g51540/Bradi1g74590/Bradi1g76870/Bradi2g54920/Bradi3g22340/Bradi3g37240/Bradi4g14937/Bradi4g23800/Bradi4g30750/Bradi5g17650/Bradi5g19130	16
GO - Biological Process	9	GO:0016053	organic acid biosynthetic process	16/209	240/8080	0.000472541811318369	0.0155852632182046	0.0133933754662052	Bradi1g01800/Bradi1g17090/Bradi1g21330/Bradi1g26530/Bradi1g44020/Bradi1g51540/Bradi1g74590/Bradi1g76870/Bradi2g54920/Bradi3g22340/Bradi3g37240/Bradi4g14937/Bradi4g23800/Bradi4g30750/Bradi5g17650/Bradi5g19130	16
GO - Biological Process	9	GO:0019752	carboxylic acid metabolic process	24/209	447/8080	0.000510992236662447	0.0155852632182046	0.0133933754662052	Bradi1g01800/Bradi1g17090/Bradi1g21330/Bradi1g26530/Bradi1g39167/Bradi1g44020/Bradi1g50067/Bradi1g51540/Bradi1g68807/Bradi1g74590/Bradi1g76870/Bradi2g05620/Bradi2g33450/Bradi2g54920/Bradi3g06350/Bradi3g22340/Bradi3g37240/Bradi3g49260/Bradi4g14937/Bradi4g23800/Bradi4g30750/Bradi5g17650/Bradi5g19130/Bradi5g21770	24
GO - Biological Process	9	GO:1901605	alpha-amino acid metabolic process	10/209	125/8080	0.00143999175210808	0.0399270440357241	0.0343117651937715	Bradi1g01800/Bradi1g26530/Bradi1g50067/Bradi1g68807/Bradi1g74590/Bradi2g54920/Bradi3g06350/Bradi3g37240/Bradi3g49260/Bradi5g17650	10
GO - Molecular function	1	GO:0140098	catalytic activity, acting on RNA	05/40	219/12269	0.000684761719387377	0.0148049404867731	0.0124037095377905	Bradi1g11876/Bradi1g28353/Bradi2g38163/Bradi3g16660/Bradi5g23760	5
GO - Molecular function	1	GO:0016779	nucleotidyltransferase activity	04/40	138/12269	0.00102291575169011	0.0148049404867731	0.0124037095377905	Bradi1g18510/Bradi1g28353/Bradi2g38163/Bradi3g16660	4
GO - Molecular function	1	GO:0003899	DNA-directed 5'-3' RNA polymerase activity	03/40	65/12269	0.00121912534321947	0.0148049404867731	0.0124037095377905	Bradi1g28353/Bradi2g38163/Bradi3g16660	3
GO - Molecular function	1	GO:0034062	5'-3' RNA polymerase activity	03/40	70/12269	0.00151070821293603	0.0148049404867731	0.0124037095377905	Bradi1g28353/Bradi2g38163/Bradi3g16660	3
GO - Molecular function	1	GO:0097747	RNA polymerase activity	03/40	70/12269	0.00151070821293603	0.0148049404867731	0.0124037095377905	Bradi1g28353/Bradi2g38163/Bradi3g16660	3
GO - Molecular function	3	GO:0016829	lyase activity	06/27	162/12269	1.1364973609982e-06	4.57256732341713e-05	3.26320593999438e-05	Bradi1g39206/Bradi1g59690/Bradi1g63020/Bradi2g08220/Bradi2g51120/Bradi3g02130	6
GO - Molecular function	3	GO:0010333	terpene synthase activity	03/27	11/12269	1.55002282149733e-06	4.57256732341713e-05	3.26320593999438e-05	Bradi1g59690/Bradi2g08220/Bradi3g02130	3
GO - Molecular function	3	GO:0016838	carbon-oxygen lyase activity, acting on phosphates	03/27	15/12269	4.249278687725e-06	8.35691475252583e-05	5.96389991259649e-05	Bradi1g59690/Bradi2g08220/Bradi3g02130	3
GO - Molecular function	3	GO:0016835	carbon-oxygen lyase activity	04/27	56/12269	6.31777368784502e-06	9.31871618957141e-05	6.65028809246845e-05	Bradi1g59690/Bradi1g63020/Bradi2g08220/Bradi3g02130	4
GO - Molecular function	3	GO:0000287	magnesium ion binding	04/27	81/12269	2.75635706385646e-05	0.000325250133535062	0.000232114279061596	Bradi1g39206/Bradi1g59690/Bradi2g08220/Bradi3g02130	4
GO - Molecular function	3	GO:0016831	carboxy-lyase activity	02/27	48/12269	0.00494276064383517	0.0486038129977125	0.0346860396058608	Bradi1g39206/Bradi2g51120	2
GO - Molecular function	4	GO:0005516	calmodulin binding	5/145	27/12269	1.40861421641837e-05	0.00184528462350806	0.00174964713197229	Bradi1g03470/Bradi1g70350/Bradi3g05760/Bradi3g46060/Bradi5g24460	5
GO - Molecular function	5	GO:0003700	DNA-binding transcription factor activity	07/43	333/12269	0.00014155309963662	0.0082122265812048	0.00710502660234013	Bradi1g11800/Bradi1g72449/Bradi2g02720/Bradi2g18980/Bradi2g21060/Bradi2g52370/Bradi2g53760	7
GO - Molecular function	5	GO:0140110	transcription regulator activity	07/43	359/12269	0.000224992509074104	0.0082122265812048	0.00710502660234013	Bradi1g11800/Bradi1g72449/Bradi2g02720/Bradi2g18980/Bradi2g21060/Bradi2g52370/Bradi2g53760	7
GO - Molecular function	5	GO:0015108	chloride transmembrane transporter activity	02/43	13/12269	0.000913239223199104	0.0222221544311782	0.0192260889094548	Bradi2g11652/Bradi3g56670	2
GO - Molecular function	6	GO:0022857	transmembrane transporter activity	23/199	421/12269	3.34799873630129e-07	4.9215581423629e-05	3.77090383983409e-05	Bradi1g00700/Bradi1g23450/Bradi1g37667/Bradi1g46150/Bradi1g53680/Bradi1g69120/Bradi1g74420/Bradi2g12727/Bradi2g22520/Bradi2g22530/Bradi2g26740/Bradi2g46750/Bradi2g47330/Bradi2g53320/Bradi2g56640/Bradi2g57900/Bradi3g07110/Bradi3g17900/Bradi3g27000/Bradi4g26354/Bradi5g15360/Bradi5g18830/Bradi5g19787	23
GO - Molecular function	6	GO:0016705	oxidoreductase activity, acting on paired donors, with incorporation or reduction of molecular oxygen	15/199	196/12269	6.79678526448219e-07	4.99563716939441e-05	3.82766328052418e-05	Bradi1g51780/Bradi1g57000/Bradi1g69330/Bradi2g31510/Bradi2g53470/Bradi3g06597/Bradi3g22820/Bradi3g30510/Bradi3g30590/Bradi3g42220/Bradi4g16560/Bradi4g35940/Bradi4g42540/Bradi5g02460/Bradi5g11750	15
GO - Molecular function	6	GO:0046915	transition metal ion transmembrane transporter activity	5/199	14/12269	1.89778000872101e-06	9.29912204273294e-05	7.12499862923326e-05	Bradi1g37667/Bradi1g53680/Bradi2g22520/Bradi2g22530/Bradi3g17900	5
GO - Molecular function	6	GO:0022804	active transmembrane transporter activity	13/199	172/12269	4.42087080782643e-06	0.000162467002187621	0.000124482414851955	Bradi1g00700/Bradi1g69120/Bradi1g74420/Bradi2g12727/Bradi2g26740/Bradi2g46750/Bradi2g47330/Bradi2g53320/Bradi2g57900/Bradi3g07110/Bradi3g27000/Bradi5g18830/Bradi5g19787	13
GO - Molecular function	6	GO:0020037	heme binding	16/199	268/12269	7.48241794911506e-06	0.000219983087703983	0.000168551309590592	Bradi1g17850/Bradi1g37100/Bradi1g51780/Bradi1g57000/Bradi1g69330/Bradi1g76330/Bradi2g31510/Bradi2g53470/Bradi3g22820/Bradi3g30510/Bradi3g30590/Bradi3g42220/Bradi4g16560/Bradi4g35940/Bradi4g42540/Bradi5g02460	16
GO - Molecular function	6	GO:0046906	tetrapyrrole binding	16/199	272/12269	9.02142850820535e-06	0.000221024998451031	0.000169349622873328	Bradi1g17850/Bradi1g37100/Bradi1g51780/Bradi1g57000/Bradi1g69330/Bradi1g76330/Bradi2g31510/Bradi2g53470/Bradi3g22820/Bradi3g30510/Bradi3g30590/Bradi3g42220/Bradi4g16560/Bradi4g35940/Bradi4g42540/Bradi5g02460	16
GO - Molecular function	6	GO:0004497	monooxygenase activity	11/199	144/12269	2.213472493636e-05	0.00046482922366356	0.000356152717021131	Bradi1g51780/Bradi2g31510/Bradi2g53470/Bradi3g22820/Bradi3g30510/Bradi3g30590/Bradi3g42220/Bradi4g16560/Bradi4g35940/Bradi5g02460/Bradi5g11750	11
GO - Molecular function	6	GO:0015291	secondary active transmembrane transporter activity	8/199	85/12269	6.87967878529671e-05	0.00126414097679827	0.000968586355298352	Bradi1g00700/Bradi1g69120/Bradi1g74420/Bradi2g26740/Bradi2g46750/Bradi2g53320/Bradi3g27000/Bradi5g18830	8
GO - Molecular function	6	GO:0005506	iron ion binding	13/199	242/12269	0.000159354351607556	0.00260278774292342	0.00199425913707702	Bradi1g51780/Bradi1g57000/Bradi1g69330/Bradi2g31510/Bradi2g53470/Bradi3g22820/Bradi3g30510/Bradi3g30590/Bradi3g42220/Bradi4g16560/Bradi4g35940/Bradi4g42540/Bradi5g02460	13
GO - Molecular function	6	GO:0015318	inorganic molecular entity transmembrane transporter activity	12/199	244/12269	0.000631023715507621	0.00927604861796203	0.00710731974308584	Bradi1g00700/Bradi1g37667/Bradi1g53680/Bradi1g74420/Bradi2g22520/Bradi2g22530/Bradi2g26740/Bradi2g53320/Bradi2g56640/Bradi3g07110/Bradi3g17900/Bradi3g27000	12
GO - Molecular function	6	GO:0015075	ion transmembrane transporter activity	12/199	266/12269	0.00133545101219169	0.0178464817083798	0.013673996010001	Bradi1g37667/Bradi1g53680/Bradi1g74420/Bradi2g22520/Bradi2g22530/Bradi2g26740/Bradi2g53320/Bradi2g56640/Bradi3g07110/Bradi3g17900/Bradi3g27000/Bradi5g15360	12
GO - Molecular function	6	GO:0015297	antiporter activity	5/199	60/12269	0.00283007063921755	0.0337185448329534	0.0258351900975726	Bradi1g69120/Bradi2g26740/Bradi2g46750/Bradi2g53320/Bradi5g18830	5
GO - Molecular function	6	GO:0016747	transferase activity, transferring acyl groups other than amino-acyl groups	9/199	183/12269	0.00298191212808432	0.0337185448329534	0.0258351900975726	Bradi1g69637/Bradi1g77940/Bradi2g12850/Bradi2g55250/Bradi3g22950/Bradi3g30220/Bradi3g39140/Bradi3g48530/Bradi4g36850	9
GO - Molecular function	6	GO:0008324	cation transmembrane transporter activity	9/199	190/12269	0.00382438845614034	0.0401560787894735	0.0307676364516553	Bradi1g37667/Bradi1g53680/Bradi2g22520/Bradi2g22530/Bradi2g26740/Bradi2g53320/Bradi3g07110/Bradi3g17900/Bradi5g15360	9
GO - Molecular function	6	GO:0016758	transferase activity, transferring hexosyl groups	12/199	307/12269	0.00434241148074699	0.0425556325113205	0.0326061774343809	Bradi1g27290/Bradi1g33490/Bradi2g36297/Bradi3g06487/Bradi3g16307/Bradi4g35342/Bradi4g36968/Bradi4g40740/Bradi5g03390/Bradi5g16100/Bradi5g16120/Bradi5g18020	12
GO - Molecular function	6	GO:0016757	transferase activity, transferring glycosyl groups	14/199	396/12269	0.00519678362107836	0.0477454495186574	0.0365826215431174	Bradi1g27290/Bradi1g33490/Bradi2g01497/Bradi2g36297/Bradi3g06487/Bradi3g16307/Bradi4g35342/Bradi4g36968/Bradi4g40740/Bradi5g03390/Bradi5g14910/Bradi5g16100/Bradi5g16120/Bradi5g18020	14
GO - Molecular function	8	GO:0016765	transferase activity, transferring alkyl or aryl (other than methyl) groups	6/145	46/12269	1.55893640839605e-05	0.00224486842809031	0.00208405183017156	Bradi1g50826/Bradi1g50840/Bradi1g60750/Bradi1g71373/Bradi2g12150/Bradi4g01130	6
GO - Molecular function	8	GO:0016702	oxidoreductase activity, acting on single donors with incorporation of molecular oxygen, incorporation of two atoms of oxygen	4/145	20/12269	7.82669514700711e-05	0.00400769643371515	0.00372059537340514	Bradi1g09260/Bradi1g09270/Bradi3g26930/Bradi3g39980	4
GO - Molecular function	8	GO:0016705	oxidoreductase activity, acting on paired donors, with incorporation or reduction of molecular oxygen	10/145	196/12269	0.000109515104905896	0.00400769643371515	0.00372059537340514	Bradi1g16580/Bradi1g22370/Bradi1g36640/Bradi1g75740/Bradi2g10770/Bradi3g04750/Bradi3g08160/Bradi4g41690/Bradi4g45037/Bradi5g00961	10
GO - Molecular function	8	GO:0016829	lyase activity	9/145	162/12269	0.000127979553513199	0.00400769643371515	0.00372059537340514	Bradi1g05450/Bradi1g10480/Bradi1g31670/Bradi1g36260/Bradi2g02370/Bradi3g49280/Bradi4g24367/Bradi5g00970/Bradi5g15830	9
GO - Molecular function	8	GO:0051213	dioxygenase activity	4/145	23/12269	0.000139156126170665	0.00400769643371515	0.00372059537340514	Bradi1g09260/Bradi1g09270/Bradi3g26930/Bradi3g39980	4
GO - Molecular function	8	GO:0016701	oxidoreductase activity, acting on single donors with incorporation of molecular oxygen	4/145	28/12269	0.00030733590466937	0.00737606171206488	0.00684765963035263	Bradi1g09260/Bradi1g09270/Bradi3g26930/Bradi3g39980	4
GO - Molecular function	8	GO:0046906	tetrapyrrole binding	11/145	272/12269	0.000380867746225558	0.00783499363664005	0.0072737148527287	Bradi1g17870/Bradi1g22370/Bradi1g58350/Bradi1g61540/Bradi1g75740/Bradi3g04750/Bradi3g08160/Bradi4g41690/Bradi5g00961/Bradi5g27150/Bradi5g27160	11
GO - Molecular function	8	GO:0020037	heme binding	10/145	268/12269	0.00129769620582395	0.023358531704831	0.0216851865973212	Bradi1g17870/Bradi1g22370/Bradi1g61540/Bradi1g75740/Bradi3g04750/Bradi3g08160/Bradi4g41690/Bradi5g00961/Bradi5g27150/Bradi5g27160	10
GO - Molecular function	8	GO:0016830	carbon-carbon lyase activity	5/145	71/12269	0.00149783410622632	0.0239653456996212	0.0222485299989173	Bradi1g10480/Bradi1g31670/Bradi1g36260/Bradi2g02370/Bradi4g24367	5
GO - Molecular function	9	GO:0005506	iron ion binding	17/249	242/12269	8.83529143717378e-06	0.00153734071006824	0.00126484172153225	Bradi1g06030/Bradi1g06160/Bradi1g76870/Bradi2g05600/Bradi2g19910/Bradi2g44300/Bradi2g48450/Bradi3g06780/Bradi3g17090/Bradi3g18850/Bradi3g36330/Bradi3g36347/Bradi4g23800/Bradi4g30750/Bradi4g31380/Bradi5g00980/Bradi5g19130	17
GO - Molecular function	9	GO:0004497	monooxygenase activity	12/249	144/12269	3.63256216461414e-05	0.002736517126871	0.0022514599470929	Bradi1g04810/Bradi1g06030/Bradi2g19910/Bradi2g44300/Bradi2g48450/Bradi2g61500/Bradi3g06780/Bradi3g17090/Bradi3g36330/Bradi3g36347/Bradi4g31380/Bradi5g00980	12
GO - Molecular function	9	GO:0016831	carboxy-lyase activity	7/249	48/12269	4.7181329773638e-05	0.002736517126871	0.0022514599470929	Bradi1g39167/Bradi1g50067/Bradi1g65440/Bradi1g68807/Bradi2g60926/Bradi5g14640/Bradi5g21770	7
GO - Molecular function	9	GO:0016758	transferase activity, transferring hexosyl groups	17/249	307/12269	0.000176539118551094	0.0076794516569726	0.00631824213761811	Bradi1g23110/Bradi1g25117/Bradi1g26760/Bradi1g26790/Bradi1g37120/Bradi1g43410/Bradi1g44630/Bradi1g64120/Bradi1g72350/Bradi2g05050/Bradi2g20800/Bradi3g01880/Bradi3g07750/Bradi3g59440/Bradi4g22700/Bradi5g03380/Bradi5g18040	17
GO - Molecular function	9	GO:0016757	transferase activity, transferring glycosyl groups	19/249	396/12269	0.000461049958592358	0.0160445385590141	0.013200588288118	Bradi1g06560/Bradi1g23110/Bradi1g25117/Bradi1g26760/Bradi1g26790/Bradi1g37120/Bradi1g43410/Bradi1g44630/Bradi1g64120/Bradi1g64560/Bradi1g72350/Bradi2g05050/Bradi2g20800/Bradi3g01880/Bradi3g07750/Bradi3g59440/Bradi4g22700/Bradi5g03380/Bradi5g18040	19
GO - Molecular function	9	GO:0016830	carbon-carbon lyase activity	7/249	71/12269	0.00057366336299997	0.0166362375269991	0.0136874065557888	Bradi1g39167/Bradi1g50067/Bradi1g65440/Bradi1g68807/Bradi2g60926/Bradi5g14640/Bradi5g21770	7
GO - Molecular function	9	GO:0016620	oxidoreductase activity, acting on the aldehyde or oxo group of donors, NAD or NADP as acceptor	5/249	37/12269	0.0008479247302277	0.0210769861513743	0.0173410170392432	Bradi1g37090/Bradi2g42360/Bradi2g54920/Bradi3g30160/Bradi5g12330	5
GO - Molecular function	9	GO:0020037	heme binding	14/249	268/12269	0.00115461358138511	0.0231326666326135	0.0190323210044491	Bradi1g06030/Bradi2g19910/Bradi2g44300/Bradi2g48450/Bradi3g06780/Bradi3g17090/Bradi3g36330/Bradi3g36347/Bradi3g55850/Bradi3g57990/Bradi4g31380/Bradi4g44530/Bradi5g00980/Bradi5g03640	14
GO - Molecular function	9	GO:0008171	O-methyltransferase activity	4/249	24/12269	0.00127802759338536	0.0231326666326135	0.0190323210044491	Bradi1g50040/Bradi3g16530/Bradi3g39380/Bradi3g55890	4
GO - Molecular function	9	GO:0046906	tetrapyrrole binding	14/249	272/12269	0.00132946359957549	0.0231326666326135	0.0190323210044491	Bradi1g06030/Bradi2g19910/Bradi2g44300/Bradi2g48450/Bradi3g06780/Bradi3g17090/Bradi3g36330/Bradi3g36347/Bradi3g55850/Bradi3g57990/Bradi4g31380/Bradi4g44530/Bradi5g00980/Bradi5g03640	14
GO - Molecular function	9	GO:0004197	cysteine-type endopeptidase activity	3/249	12/12269	0.00158650012061412	0.0250955473624415	0.0206472742969875	Bradi1g60756/Bradi1g60762/Bradi2g50480	3
GO - Molecular function	9	GO:0016705	oxidoreductase activity, acting on paired donors, with incorporation or reduction of molecular oxygen	11/249	196/12269	0.00220188595007038	0.0314618142057241	0.025885098197087	Bradi1g06030/Bradi2g19910/Bradi2g44300/Bradi2g48450/Bradi3g06780/Bradi3g17090/Bradi3g36330/Bradi3g36347/Bradi3g53370/Bradi4g31380/Bradi5g00980	11
GO - Molecular function	9	GO:0022857	transmembrane transporter activity	18/249	421/12269	0.00236951136523219	0.0314618142057241	0.025885098197087	Bradi1g26350/Bradi1g26810/Bradi1g37826/Bradi1g51200/Bradi1g59730/Bradi1g71360/Bradi1g71370/Bradi1g75087/Bradi2g16887/Bradi2g33110/Bradi2g57310/Bradi3g27800/Bradi3g56270/Bradi4g26342/Bradi4g43580/Bradi4g43900/Bradi5g18980/Bradi5g20177	18
GO - Molecular function	9	GO:0016903	oxidoreductase activity, acting on the aldehyde or oxo group of donors	5/249	47/12269	0.00253141033839159	0.0314618142057241	0.025885098197087	Bradi1g37090/Bradi2g42360/Bradi2g54920/Bradi3g30160/Bradi5g12330	5
GO - Cellular component	1	GO:1902494	catalytic complex	09/23	201/3465	0.00109956062522139	0.0472811068845197	0.0393526960605549	Bradi1g16151/Bradi1g18510/Bradi3g16660/Bradi3g37595	4
GO - Cellular component	6	GO:0009507	chloroplast	04/58	16/3465	0.000110792670936214	0.00110792670936214	0.00104961477729045	Bradi1g74420/Bradi1g76290/Bradi3g27000/Bradi5g11750	4
GO - Cellular component	6	GO:0009536	plastid	04/58	16/3465	0.000110792670936214	0.00110792670936214	0.00104961477729045	Bradi1g74420/Bradi1g76290/Bradi3g27000/Bradi5g11750	4
GO - Cellular component	8	GO:0009521	photosystem	03/30	45/3465	0.00650581610757654	0.0379621035659851	0.0295357327515673	Bradi1g58350/Bradi2g20380/Bradi2g51480	3
GO - Cellular component	8	GO:0034357	photosynthetic membrane	03/30	48/3465	0.00779257771580666	0.0379621035659851	0.0295357327515673	Bradi1g58350/Bradi2g20380/Bradi2g51480	3
GO - Cellular component	8	GO:0009507	chloroplast	02/30	16/3465	0.00806597563975828	0.0379621035659851	0.0295357327515673	Bradi2g20380/Bradi2g51480	2
GO - Cellular component	8	GO:0009536	plastid	02/30	16/3465	0.00806597563975828	0.0379621035659851	0.0295357327515673	Bradi2g20380/Bradi2g51480	2
GO - Cellular component	8	GO:0009579	thylakoid	03/30	49/3465	0.00825263120999676	0.0379621035659851	0.0295357327515673	Bradi1g58350/Bradi2g20380/Bradi2g51480	3

## Sheet: Table S4
Table S4. Differentially expressed genes potentially belonging to immunity-related pathways. For each genes mean of the Z-score normalized expression level for each condition and cluster membership is detailed. The name of the gene is present if described in a publication (see reference column) or clearly annotated. Orthologs for O. sativa and A. thaliana are assigned if possible based on sequenc…
ID gene	normalized counts			Cluster membership	Name (Phytozome)	Comment	Name	O. sativa ortholog	A. thaliana ortholog	Reference
	430ppm CO2	1000ppm CO2	3000ppm CO2
WRKY TFs
Bradi3g18580	-0.906235751078723	-0.166601877736334	1.07283762881506	6	WRKY DNA-binding protein 11	X	BdWRKY6	OsWRKY56 (Os08g0235800)	X	Wen et al. 2014
Bradi4g01950	0.244100793373613	-1.09945057164371	0.855349778270094	7	WRKY DNA-binding protein 33	X	BdWRKY7	X	X
Bradi2g45900	-0.989452632232791	-0.0207711294890121	1.0102237617218	9	WRKY DNA-binding protein 28	X	BdWRKY16	OsWRKY35 (Os01g0665500)	X
Bradi3g09810	-0.732591103132945	-0.406674503938812	1.13926560707176	6	WRKY family transcription factor	X	BdWRKY21	OsWRKY54 (Os02g0265200)	AtWRKY22 (At4g01250)
Bradi3g06070	0.736799225058455	-1.13836401200816	0.401564786949699	7	WRKY DNA-binding protein 40	X	BdWRKY39	X	X
Bradi3g34850	-0.483141172598508	-0.666686511391209	1.14982768398972	6	WRKY family transcription factor	X	BdWRKY40	OsWRKY53 (Os08g0386200)	X
Bradi2g53760	-0.20276103962478	-0.883081755040085	1.08584279466486	5	WRKY DNA-binding protein 33	X	BdWRKY45	X
Bradi2g00280	1.06905071286299	-0.912477641773635	-0.156573071089357	1	WRKY DNA-binding protein 26	X	BdWRKY47	X	X
Bradi2g15877	-0.603143381527338	-0.551167159054859	1.1543105405822	6	WRKY family transcription factor	X	BdWRKY51	OsWRKY110 (Os05g0571200)	X
Bradi1g22680	1.08160393964888	-0.190659586925674	-0.890944352723201	4	WRKY DNA-binding protein 3	X	BdWRKY67	X	X
Bradi2g49906	1.03421626956653	-0.0723637915669497	-0.961852477999585	4	WRKY DNA-binding protein 65	X	BdWRKY77	OsWRKY84 (Os01g0750100)	AtWRKY65/69 (At1g29280/At3g56400)
MAPK
Bradi2g15317	-1.115857417515	0.30073876371187	0.815118653803126	8	MAP kinase 20	In Ath activated avec flg22 elicitation (Bethke G. et al. Mol Plant Microbe Interact. 2012) and response to ABA	BdMPK20-2	OsMPK20-3 (Os06g26340)	AtMPK11 (At1g01560)	Chen et al. 2012
Bradi2g45870	1.15429023432443	-0.550489138331248	-0.603801095993185	4	MAP kinase 20	In Osa implicated in insect defense (Li J. et al. Plant Physiol. 2019). Ath act in root formation (Zeng Q. et al. Plant Signal Behav. 2011)	BdMPK20-4	OsMPK20-5 (Os05g49140)	AtMPK13 (At1g07880)
Bradi3g53650	-0.684866418686576	-0.462686962691029	1.1475533813776	6	mitogen-activated protein kinase kinase 4	In Osa implicated in chilling stress tolerance (Xie G. et al. Biochem J. 2012). in Ath Involved in innate immunity. This protein activates MPK3/MPK6 and early-defense genes redundantly with MKK4 (but roles also in abiotic stress tolerance and development)	BdMKK4	OsMKK6 (Os01g32660)	AtMKK5 (At3g21220)
Bradi1g69400	0.962089642399157	0.0719358656161495	-1.03402550801531	2	MAP kinase kinase 9	In Ath : Autophosphorylates and also phosphorylates MPK3 and MPK6. Independently involved in ethylene and calmalexin biosynthesis. Induces transcription of ACS2. ACS6. ERF1. ERF2. ERF5. ERF6. CYP79B2. CYP79B3. CYP71A13 and PAD3.	BdMKK10-2	X	AtMKK9 (At1g73500)
Bradi3g57740	1.00928945087837	-0.0188452778692726	-0.990444173009096	2	MAPK/ERK kinase kinase 1	X	X	Os03g0262200	AtMEKK1 (AT4G08500)	X
Calcium related signalling
Bradi4g43061	-1.15220412423602	0.641823002997828	0.510381121238192	8	CALCIUM-ACTIVATED CHLORIDE CHANNEL REGULATOR	X	X	X	X	X
Bradi1g21095	0.980203989179893	0.0384811159015516	-1.01868510508144	2	EF-HAND CALCIUM-BINDING DOMAIN CONTAINING PROTEIN	X	X	Os07g0619200	X	X
SA biosynthesis & signalling
PAL biosynthesis pathway
Bradi3g31590	1.13880199822363	-0.404030183574726	-0.734771814648904	4	ADT	X	X	Os10g0523700	AtADT6 (AT1G08250)	X
Bradi4g11580	-0.686723426805004	-0.460571244814721	1.14729467161972	6	PAT	X	X	Os11g0644800	AtTAT1 (AT5G53970)	X
Bradi3g49260	-1.01223921529869	0.0249451816262773	0.987294033672408	9	BdPAL2	X	BdPAL2	X	X	Cass et al. 2015
Bradi5g15830	-1.13636454321673	0.390680951360121	0.745683591856612	8	BdPAL8	X	BdPAL8	X	X
SA modification : SAGT
Bradi4g35342	-0.892721681889955	-0.187899357248695	1.08062103913865	6	UDP-glucosyltransferase 74F1	X	X	Os09g0518200	UGT74F1 (AT2G43840)	X
Bradi5g03380	-1.01599831506284	0.0328038631080697	0.983194451954774	9	UDP-glucosyltransferase 74J8	SAGT1; salicylic acid glucosyltransferase 1. SA glucosyl transfert UGT74-3 UDP-glycosyltrasferase 74 F2-like	UGT74J8	Os04g0206500	UGT74F2 (At2G43820)	Schweiger et al. 2013
Bradi5g03390	-0.713744529642608	-0.429210784101607	1.14295531374421	6	UDP-glucosyltransferase 74J10	SAGT1; salicylic acid glucosyltransferase 1. SA glucosyl transfert UGT74-3 UDP-glycosyltrasferase 74 F2-like	UGT74J10	Os04g0206600	UGT74F2 (At2G43820)
SA modification : SAMT
Bradi1g42760	-0.878385585238828	1.08829145440627	-0.209905869167437	3	Anthranilate O-methyltransferase	X	X	Os06g0311800	AtBSMT1 (AT3G11480)	X
Bradi1g43080	-1.04912395568235	0.106824986170504	0.942298969511846	9	Jasmonate O-methyltransferase	X	X	Os06g0311800	AT3G21950	X
SA modification : MES
Bradi2g41070	-0.876483	-0.2127831	1.08926618	6	methyl esterase 1	SABP2; salicylic acid-binding protein 2; Based on nicotiana tabacum sequence	X	Os01g0557100	AT2G23620 (M-M) (AT5G10300)	X
TF linked with SA signalling
Bradi2g60300	0.629693849227684	0.523373954500737	-1.15306780372842	2	RNA-binding protein-defense related 1	BRN1. In Ath: Acts as positive regulator of salicylic acid (SA)-mediated immunity. May act on SA signaling-related genes at a post-transcriptional level (PubMed:20636102)	X	Os01g0938200	AT4G03110	X
Bradi2g27260	0.501913156000776	0.649633444082362	-1.15154660008314	2	RNA-binding protein-defense related 1	BRN1. In Ath: Acts as positive regulator of salicylic acid (SA)-mediated immunity. May act on SA signaling-related genes at a post-transcriptional level (PubMed:20636102)	X	Os05g0373400	AT4G03110	X
Bradi2g46093	-1.04343838364389	0.0934351101028464	0.950003273541043	9	GRX480	In A. thaliana GRX480 interacts with TGA factors and suppresses JA-responsive PDF1.2 transcription.		Os01g0667900	AtGRX480 (AT1G28480)	X
Bradi2g54340	1.09552384397562	-0.231738773372622	-0.863785070603	4	NPR4	X	X	OsNPR4 (Os01g0837000)	AtNPR4 (AT4G19660)	X
JA biosynthesis & signalling
JA biosynthesis
Bradi3g39980	-1.1092470313932	0.276813747133594	0.832433284259605	8	LIPOXYGENASE	X	X	OsLOX8 (Os08g0509100)	AtLOX2 (AT3G45140)	X
Bradi5g11590	-0.850441796319472	-0.251212072137162	1.10165386845663	6	LIPOXYGENASE 3	X	X	SPH (Os04g0447100)	AtLOX3 (AT1G17420)
Bradi1g69330	-0.6834136	-0.4643387	1.14775232	6	allene oxide synthase	AOS Allene oxide synthase 2-like (AtAOS2)		Os03g0225900	At5g42650	X
ET biosynthesis & signalling
ET biosynthesis
Bradi3g57620	1.14070888441441	-0.415153183309196	-0.725555701105213	4	ethylene-forming enzyme	ACC oxidase	X	Os03g0225900	At5g42650	X
Bradi2g35860	1.02054897198503	-0.0424498961778908	-0.97809907580714	2	1-AMINOCYCLOPROPANE-1-CARBOXYLATE OXIDASE 5			Os05g0149400	AT1G77330
ET signalling
Bradi2g52370	-0.334884323258428	-0.789578928800255	1.12446325205868	5	erf domain protein 9	Ethylene-responsive transcription factor 4-like; AtERF9	X	Os01g0797600	At5g44210	X
Bradi1g36530	-0.343132661336372	-0.78326086968964	1.12639353102601	5	EIN3-binding F box protein 1	SCF EBF1/2; BdEBF1	X	Os06g0605900	AT2G25490	X
Bradi3g55730	-0.757974	-0.3754045	1.13337852	6	Signal transduction histidine kinase. hybrid-type. ethylene sensor	ethylene receptor 3; In rice: Acts as negative regulator of ethylene signaling. ER located	X	Os02g0820900	AT3G23150	X
Bradi2g35080	-0.513926627627302	-0.638530720818474	1.15245734844578	6	Signal transduction histidine kinase. hybrid-type. ethylene sensor	probable ethylene response sensor 2	X	OsERS1 (Os03g0701700)	AtETR1 (AT1G66340)	X
Bradi2g17610	-0.694008871609712	-0.452222543591648	1.14623141520136	6	ethylene response DNA binding factor 3	AP2/ERF and B3 domain-containing protein Os05g0549800	X	Os01g0141000	AT3G25730	X
Bradi3g56550	-1.12203749937994	0.324853791474518	0.797183707905423	8	Signal transduction histidine kinase. hybrid-type. ethylene sensor	ethylene receptor 4; In rice : Acts as a redundant negative regulator of ethylene signaling. ER located	X	OsETR2 (Os04g0169100)	AtEIN4 (AT3G04580)	X
Bradi1g21372	1.15008213818668	-0.485691717848037	-0.664390420338648	4	ethylene induced calmodulin binding protein	calmodulin-binding transcription activator 3; Involved in the regulation of both basal resistance and systemic acquired resistance (SAR) (PubMed:21900483). Acts as negative regulator of plant immunity (PubMed:19122675. PubMed:21900483. PubMed:22345509. PubMed:28407487).	X	Os03g0191000	AT5G64220	X
Bradi5g00700	0.0925040341354434	-1.04303797842126	0.950533944285819	5	Signal transduction histidine kinase. hybrid-type. ethylene sensor	ethylene receptor 2; Acts as a redundant negative regulator of ethylene signaling ER located	X	OsETR2 (Os04g0169100)	AtEIN4 (AT3G04580)	X
CK biosynthesis & signalling
CK biosynthesis
Bradi2g17400	-0.886577053331952	-0.197403167036171	1.08398022036812	6	Isopentenyltransferase	X	X	OsIPT7 (Os05g0551700)	AtIPT1 (AT1G68460)
Bradi1g04580	-0.384746072938014	-0.750483179779835	1.13522925271785	5	TRNA DELTA 2 -ISOPENTENYLPYROPHOSPHATE TRANSFERASE-RELATED	X	X	OsIPT4 (Os03g0810100)	AtIPT5 (AT5G19040)
Bradi1g54060	-0.87914952451328	-0.208747754058392	1.08789727857167	6	TRNA DELTA 2 -ISOPENTENYLPYROPHOSPHATE TRANSFERASE-RELATED	X	X	OsIPT5 (Os07g0211700)	AtIPT3 (AT3G63110)
CK catabolism
Bradi5g18020	-0.681174026806559	-0.46687905950821	1.14805308631477	6	Putative cis-zeatin O-glucosyltransferase	X	X	OsCZOGT1 (Os04g0556500)	X	X
Bradi5g18040	-0.926307614037805	-0.133893639279707	1.06020125331751	9	cis-zeatin O-glucosyltransferase 1	X	X	OsCZOGT1 (Os04g0556500)	X	X
Bradi2g34090	-1.14895509866497	0.474845044903281	0.674110053761685	8	UDP-glycosyltransferase 73E1	X	X	Os05g0177500	X	X
Bradi3g07750	-1.01559049620526	0.0319465767656545	0.983643919439605	9	Trans-zeatin O-beta-D-glucosyltransferase	X	X	Os02g0207400	X	X
Bradi5g06377	-1.14743410324752	0.461707078726613	0.685727024520906	8	GLUCOSYL/GLUCURONOSYL TRANSFERASES	X	X	Os08g0404000	X	X
Bradi3g37690	-0.920181585125211	-0.144019617708017	1.06420120283323	6	cytokinin dehydrogenase	X	X	OsCKX5 (Os01g0775400)	AtCKX5 (AT5G21482)	X
Bradi3g29130	-1.07685369876032	0.177470365022758	0.899383333737566	9	cytokinin dehydrogenase	X	X	OsCKX3 (Os10g0483500)	AtCKX1 (AT2G41510)	X
CK signalling
Bradi5g11350	-1.10581959114137	0.265034347006647	0.840785244134726	9	RESPONSE REGULATOR OF TWO-COMPONENT SYSTEM	Os Type A RR	X	OsRR1 (Os04g0442300)	AtARR3 (AT1G59940)	X
Well known immunity-signalling component
Regulators of signal transduction
Bradi4g23367	-0.954562021252678	-0.0853987479277607	1.03996076918044	9	alpha/beta-Hydrolases superfamily protein	X	PAD4	OsPAD4 (Os11g0195500)	AtPAD4 (AT3G52430)	X
Bradi3g46060	1.09384339865398	-0.22656258143609	-0.867280817217887	4	Calmodulin-binding protein	X	CBP60B	Os02g0177800	AT5G57580	X
Bradi3g05760	1.0972333887167	-0.237073490269489	-0.860159898447209	4	Calmodulin-binding protein	X	CBP60B	Os02g0177800	AT5G57580	X
RLK/RLP
Bradi5g21960	-0.682757567641296	-0.465083600839298	1.14784116848059	6	Leucine-rich receptor-like protein kinase family protein	X	FLS2	OsFLS2 (Os04g0618700)	AtFLS2 (AT5G46330)	X
Bradi1g43417	-0.848728517316662	-0.253680671947374	1.10240918926404	6	Leucine-rich repeat protein kinase family protein	X	SOBIR1	Os06g0288100	AtSOBIR1 (AT2G31880)	X
Bradi3g10600	-0.671023870994818	-0.478303291330123	1.14932716232494	6	Leucine-rich repeat protein kinase family protein	X	X	Os06g0586150	AT3G47570	X
Bradi3g08660	-0.639067439527554	-0.513349588870616	1.15241702839817	6	Protein kinase family protein with leucine-rich repeat domain	X	X	OsRLK5 (Os02g0227700)	AT5G25930	X
Bradi1g01432	1.12867409703772	-0.775455704745783	-0.35321839229194	1	Leucine-rich repeat protein kinase family protein	X	X	Os11g0208900	X	X
Bradi3g17756	0.49544022267724	-1.15099428860439	0.655554065927143	7	Leucine-rich repeat transmembrane protein kinase	X	X	Os04g0616700	X	X
Bradi2g56750	-1.11007519491255	0.279719969560954	0.830355225351592	8	Leucine-rich receptor-like protein kinase family protein	X	X	Os01g0878300	X	X
Bradi5g15010	-1.03198654974711	0.0673811697584762	0.964605379988638	9	Leucine-rich repeat (LRR) family protein	X	X	Os04g0505200	X	X
Bradi2g19297	-0.98680499442199	-0.0258873324967147	1.0126923269187	9	Leucine-rich repeat transmembrane protein kinase protein	X	X	Os05g0524500	X	X
Bradi1g14050	-0.966619629608338	-0.0637138307011045	1.03033346030944	9	Leucine-rich repeat (LRR) family protein	X	X	Os03g0637600	X	X
Bradi2g57451	-1.08279893669237	0.194038205359935	0.888760731332436	9	BAK1-interacting receptor-like kinase 1	X	BIR1	Os01g0892300	AtBIR1 (AT5G48380)	X
R proteins (NBS-LRR)
Bradi5g27069	1.04125942139596	-0.952872828648532	-0.0883865927474276	1	NB-ARC domain-containing disease resistance protein	X	X	X	X	X
Bradi4g44590	-1.05448825750614	0.934725276889092	0.119762980617046	3	Disease resistance protein (CC-NBS-LRR class) family	probable disease resistance RPP8-like protein 4	X	X	X	X
Bradi2g01280	0.994915205734432	0.0100931828171427	-1.00500838855157	2	Disease resistance protein (CC-NBS-LRR class) family	X	X	X	X	X
Bradi2g01077	1.11523517950585	-0.298411357585517	-0.816823821920328	4	NB-ARC domain-containing disease resistance protein	X	X	X	X	X
Bradi4g11920	1.15444883811882	-0.556345958278598	-0.598102879840223	4	NB-ARC domain-containing disease resistance protein	X	X	X	X	X
Bradi4g07902	-0.799441680265147	-0.321853653520805	1.12129533378595	6	NB-ARC domain-containing disease resistance protein	X	X	X	X	X
Bradi2g05611	-0.845799304349405	-0.257884933851999	1.1036842382014	6	NB-ARC domain-containing disease resistance protein	X	X	X	X	X
Bradi4g09794	0.395344233173665	-1.1372343566605	0.741890123486834	7	NB-ARC domain-containing disease resistance protein	X	X	X	X	X
Bradi2g36788	0.576605262556366	-1.15470021806743	0.578094955511062	7	NB-ARC domain-containing disease resistance protein	X	X	X	X	X
Bradi2g37191	0.502054356771813	-1.151558170154	0.64950381338219	7	NB-ARC domain-containing disease resistance protein	X	X	X	X	X
Bradi1g51320	-1.11293599074572	0.289953248356611	0.822982742389108	8	Disease resistance protein (CC-NBS-LRR class) family	X	X	X	X	X
Bradi4g40727	-0.938526453669305	-0.113296702977026	1.05182315664633	9	NB-ARC domain-containing disease resistance protein	X	X	X	X	X
Bradi2g35767	0.0445830098658803	-1.02154586015161	0.976962850285726	5	LRR and NB-ARC domains-containing disease resistance protein	X	X	X	X	X
Hormonal modulation
Bradi4g07902	-0.799441680265147	-0.321853653520805	1.12129533378595	6	NB-ARC domain-containing disease resistance protein	X	RGA2	Os12g0438300	X	X
PR proteins
Bradi2g48940	-1.08016687754103	0.186629569789781	0.893537307751247	9	pathogenesis-related family protein	X	X	Os01g0731100	AT1G78780	X
Bradi1g02210	-0.442698034862152	-0.702238464861149	1.1449364997233	5	WAK	X	X	OsWAK28 (Os03g0841100)	AtWAK5 (AT1G21230)	X
Bradi1g25517	-0.739766104052371	-0.397944782498835	1.13771088655121	6	Laminarinase	X	X	Os07g0539900	AT4G26830	X
Bradi4g09750	-1.1230706380655	0.793988016234498	0.329082621830999	3	Chitinase family protein	X	X	Os04g0173800	AT2G43610	X
Bradi4g09430	-1.14381596075884	0.434927011135547	0.708888949623297	8	chitinase A	X	X	Os06g0356800	AT5G24090	X
Bradi4g09740	-1.14989549457395	0.483814527938076	0.666080966635876	8	Chitinase family protein	X	X	Os04g0173800	AT2G43620	X
Bradi2g60441	-0.606763096984545	-0.547429187278788	1.15419228426333	6	Laminarinase	X	X	Os01g0946700	AtPR2 (AT3G57260)	X
Bradi3g26850	-1.13068160222282	0.362438519714354	0.768243082508465	8	CHITINASE	X	X	Os10g0416500	X	X
Bradi3g48230	-0.875611783386526	-0.214097478136961	1.08970926152349	6	homolog of carrot EP3-3 chitinase	X	X	Os02g0605900	AT3G54420	X
Dirigent proteins
Bradi3g38881	-1.02728999260367	0.970270064954732	0.0570199276489387	3	Disease resistance-responsive (dirigent-like protein) family protein	X	X	Os11g0179000	AT5G42510	X
Bradi4g24040	-0.842434294196426	-0.262689531456197	1.10512382565262	6	Disease resistance-responsive (dirigent-like protein) family protein	Dirigent protein 22, DIR22; Dirigent proteins impart stereoselectivity on the phenoxy radical-coupling reaction, yielding optically active lignans from two molecules of coniferyl alcohol in the biosynthesis of lignans, flavonolignans, and alkaloids and thus plays a central role in plant secondary metabolism	X	Os11g0180000	AT1G65870	X
Bradi4g41320	-1.14360389617929	0.710104502233304	0.433499393945987	8	Disease resistance-responsive (dirigent-like protein) family protein	Dirigent protein 22, DIR22; Dirigent proteins impart stereoselectivity on the phenoxy radical-coupling reaction, yielding optically active lignans from two molecules of coniferyl alcohol in the biosynthesis of lignans, flavonolignans, and alkaloids and thus plays a central role in plant secondary metabolism	X	Os12g0174700	AT1G65870	X
Bradi1g20910	-1.03293937636341	0.0695052784481325	0.963434097915276	9	Disease resistance-responsive (dirigent-like protein) family protein	Dirigent protein 21	X	Os07g0617500	AT1G65870	X
Tyrosine metabolism
Bradi3g15040	0.947487430713979	0.0978336429063224	-1.0453210736203	2	Tyrosinase	X	X	Os01g0793100	X	X
Bradi4g11580	-0.686723426805004	-0.460571244814721	1.14729467161972	6	Tyrosine aminotransferase	X	X	Os11g0644800	AT5G53970	X
Bradi2g02370	-1.15410460025026	0.609175948126068	0.544928652124193	8	Tryptophan decarboxylase	X	X	OsTDC3 (Os08g0140500)	AtAAS (AT2G20340)	X
Bradi1g71890	-1.15086687611812	0.494014305844378	0.656852570273741	8	ALCOHOL DEHYDROGENASE RELATED	X	X	Os03g0189400	AT5G42250	X
Bradi3g20810	-1.14502689473865	0.443342793798635	0.701684100940012	8	ALCOHOL DEHYDROGENASE RELATED	X	X	Os10g0159800	AT1G32780	X
Bradi4g22630	-1.15055701072295	0.659918471141291	0.490638539581655	8	ALCOHOL DEHYDROGENASE RELATED	X	X	OsADH1 (Os11g0210300)	AtADH1 (AT1G77120)	X
Bradi2g52260	-1.03978163271286	0.0849878188906382	0.954793813822224	9	Tyrosine-dopa oxidase	X	X	Os01g0793300	X	X
Bradi3g14990	-0.957700550983227	-0.0798153140920111	1.03751586507524	9	Tyrosine-dopa oxidase	X	X	Os04g0624500	X	X
Tryptophan metabolism
Bradi2g02370	-1.15410460025026	0.609175948126068	0.544928652124193	8	Tryptophan decarboxylase	X	X	OsTDC3 (Os08g0140500)	AtAAS (AT2G20340)	X

## Sheet: Table S5
Table S5. Differentially expressed genes cluster membership
ID gene	Cluster number
Bradi1g42760	3
Bradi5g26320	4
Bradi1g25440	9
Bradi1g53680	6
Bradi5g00980	9
Bradi1g14170	4
Bradi2g22520	6
Bradi5g00970	8
Bradi3g15097	1
Bradi3g44290	4
Bradi2g08220	3
Bradi1g33950	4
Bradi1g25530	8
Bradi3g04750	8
Bradi1g30113	4
Bradi2g11940	9
Bradi1g42513	1
Bradi3g53790	4
Bradi3g44820	8
Bradi1g14745	1
Bradi4g45010	4
Bradi1g02400	8
Bradi5g15830	8
Bradi1g66710	9
Bradi1g54890	3
Bradi1g17430	4
Bradi2g09915	1
Bradi4g31140	9
Bradi5g11630	9
Bradi4g17230	8
Bradi3g36540	8
Bradi2g55940	4
Bradi1g63927	8
Bradi2g48340	7
Bradi2g10294	3
Bradi5g17126	7
Bradi1g69044	4
Bradi1g69160	1
Bradi2g38995	7
Bradi2g53620	8
Bradi3g26850	8
Bradi2g23750	4
Bradi5g00961	8
Bradi3g51520	4
Bradi2g21420	4
Bradi2g50470	4
Bradi1g33050	1
Bradi2g08730	3
Bradi2g05070	9
Bradi3g22697	6
Bradi1g03770	1
Bradi2g51540	8
Bradi3g14360	9
Bradi4g22700	9
Bradi1g57930	8
Bradi2g34120	4
Bradi5g19330	4
Bradi1g03510	4
Bradi1g59690	3
Bradi1g72449	5
Bradi5g26725	6
Bradi4g43314	1
Bradi2g12105	9
Bradi4g32759	7
Bradi1g48050	4
Bradi2g18590	8
Bradi2g57795	7
Bradi3g42220	6
Bradi1g71667	9
Bradi4g44390	8
Bradi1g12280	8
Bradi1g15290	9
Bradi5g15970	8
Bradi3g06070	7
Bradi2g61590	8
Bradi3g27900	4
Bradi2g21185	5
Bradi1g54350	8
Bradi3g02130	3
Bradi3g15283	7
Bradi4g09750	3
Bradi3g01028	7
Bradi3g06780	9
Bradi2g55310	1
Bradi1g41698	7
Bradi1g43210	1
Bradi3g52760	8
Bradi3g50540	4
Bradi4g21170	9
Bradi3g21150	8
Bradi1g43990	4
Bradi2g19910	9
Bradi3g11060	3
Bradi1g69070	6
Bradi3g09620	4
Bradi3g00184	7
Bradi1g57060	4
Bradi3g32297	4
Bradi4g05973	1
Bradi1g06190	7
Bradi2g07583	1
Bradi3g52350	9
Bradi2g48730	1
Bradi4g39910	8
Bradi2g62122	7
Bradi2g47290	8
Bradi3g17120	8
Bradi3g26930	8
Bradi4g30060	9
Bradi2g61830	9
Bradi1g16151	1
Bradi2g27050	7
Bradi3g28306	4
Bradi1g09270	8
Bradi1g68640	7
Bradi5g03115	7
Bradi3g41930	3
Bradi4g13222	7
Bradi2g45390	4
Bradi1g31670	8
Bradi3g49020	1
Bradi4g20117	4
Bradi1g71890	8
Bradi5g18277	6
Bradi1g03686	8
Bradi1g30240	4
Bradi2g45143	8
Bradi1g78726	1
Bradi2g42360	9
Bradi2g56750	8
Bradi3g60592	1
Bradi4g03000	7
Bradi1g51540	9
Bradi1g19054	1
Bradi3g17756	7
Bradi3g38020	1
Bradi1g57155	1
Bradi2g04530	8
Bradi4g09430	8
Bradi1g58220	8
Bradi3g35560	1
Bradi1g48826	7
Bradi2g39290	4
Bradi3g55850	9
Bradi1g70000	7
Bradi2g61485	6
Bradi4g13660	8
Bradi4g36420	7
Bradi3g27800	9
Bradi3g04681	7
Bradi1g52011	9
Bradi1g51080	3
Bradi2g05600	9
Bradi4g28640	4
Bradi2g26212	1
Bradi2g62520	8
Bradi1g30710	1
Bradi2g28880	7
Bradi3g55317	9
Bradi4g27570	9
Bradi2g12914	1
Bradi1g42970	4
Bradi1g69393	1
Bradi4g45037	8
Bradi1g72910	8
Bradi3g20677	4
Bradi4g24302	7
Bradi2g22875	7
Bradi1g28992	7
Bradi3g07190	9
Bradi5g27069	1
Bradi4g32370	1
Bradi5g21290	8
Bradi4g22590	7
Bradi2g45520	4
Bradi4g05965	1
Bradi4g40430	7
Bradi1g33640	9
Bradi2g26117	1
Bradi3g34890	7
Bradi4g38250	8
Bradi2g55920	5
Bradi3g42350	4
Bradi2g47540	9
Bradi3g15300	9
Bradi3g47067	7
Bradi2g52260	9
Bradi1g15830	6
Bradi1g62400	6
Bradi2g58360	7
Bradi1g69320	3
Bradi3g37940	9
Bradi5g16310	4
Bradi4g37862	8
Bradi1g17870	8
Bradi1g44170	7
Bradi4g18359	7
Bradi2g48450	9
Bradi5g27160	8
Bradi2g46810	7
Bradi1g44950	7
Bradi5g22532	7
Bradi1g67640	1
Bradi4g11900	1
Bradi1g47180	9
Bradi2g52330	3
Bradi1g08907	9
Bradi3g42627	9
Bradi3g51810	1
Bradi1g67030	7
Bradi1g18702	1
Bradi1g28055	1
Bradi2g31166	7
Bradi4g31330	8
Bradi5g27150	8
Bradi2g19297	9
Bradi1g33670	9
Bradi2g01320	9
Bradi2g38163	1
Bradi2g30465	7
Bradi4g41690	8
Bradi2g04670	4
Bradi2g17680	9
Bradi2g48890	8
Bradi3g51920	4
Bradi2g12300	8
Bradi2g16887	9
Bradi1g22370	8
Bradi1g46220	8
Bradi2g21490	7
Bradi2g29342	7
Bradi1g12715	1
Bradi2g16290	9
Bradi2g47700	3
Bradi1g17460	8
Bradi4g43690	1
Bradi2g51957	1
Bradi1g05450	8
Bradi4g25750	9
Bradi3g57990	9
Bradi3g49350	1
Bradi2g15490	1
Bradi3g31520	4
Bradi5g15520	3
Bradi3g54370	4
Bradi4g24906	7
Bradi1g77080	4
Bradi2g37790	7
Bradi5g26835	1
Bradi3g35535	7
Bradi1g37183	7
Bradi2g06730	9
Bradi4g13208	7
Bradi3g23251	7
Bradi5g11516	7
Bradi3g04556	7
Bradi3g42877	7
Bradi1g33520	9
Bradi1g19220	6
Bradi2g60537	7
Bradi2g02060	8
Bradi3g10058	4
Bradi5g14870	4
Bradi1g43410	9
Bradi2g38300	7
Bradi3g05767	4
Bradi4g20404	7
Bradi4g25630	4
Bradi1g75670	8
Bradi3g53370	9
Bradi4g34240	4
Bradi2g33110	9
Bradi3g42050	8
Bradi2g27140	4
Bradi4g07950	7
Bradi5g06377	8
Bradi2g50620	8
Bradi5g14367	1
Bradi3g60517	8
Bradi1g71373	8
Bradi1g01432	1
Bradi3g54236	4
Bradi5g08820	8
Bradi2g28886	1
Bradi1g34681	7
Bradi2g56037	4
Bradi2g54340	4
Bradi2g21942	5
Bradi3g44246	1
Bradi1g45200	9
Bradi2g33270	4
Bradi2g45970	8
Bradi2g49420	4
Bradi5g20760	4
Bradi5g17200	6
Bradi2g48980	7
Bradi4g39010	7
Bradi1g51090	8
Bradi3g19270	3
Bradi1g09910	8
Bradi4g21800	4
Bradi2g43640	4
Bradi4g44760	1
Bradi2g09195	5
Bradi3g14000	4
Bradi3g14970	3
Bradi1g46656	1
Bradi3g17920	8
Bradi2g59180	4
Bradi1g30850	4
Bradi3g21245	7
Bradi1g23610	8
Bradi3g46030	2
Bradi4g43630	8
Bradi4g27624	7
Bradi4g28070	8
Bradi5g14023	1
Bradi1g50067	9
Bradi2g00280	1
Bradi2g00600	3
Bradi2g22870	1
Bradi2g25646	7
Bradi2g51120	3
Bradi3g09398	1
Bradi3g09430	4
Bradi3g20740	8
Bradi2g10564	7
Bradi3g04737	7
Bradi3g51130	4
Bradi4g14000	7
Bradi4g35530	5
Bradi2g35578	9
Bradi3g33170	8
Bradi1g71360	9
Bradi5g24937	7
Bradi4g01930	1
Bradi4g16682	7
Bradi1g15507	4
Bradi3g34787	3
Bradi1g64120	9
Bradi1g02480	7
Bradi4g06051	7
Bradi3g16121	7
Bradi2g22530	6
Bradi1g06410	4
Bradi1g55357	7
Bradi4g36880	4
Bradi1g45852	7
Bradi1g04150	1
Bradi1g11710	4
Bradi3g42891	1
Bradi1g39282	4
Bradi5g12150	6
Bradi3g12925	9
Bradi3g50690	4
Bradi4g37715	1
Bradi3g20045	5
Bradi2g07597	4
Bradi3g27827	3
Bradi3g36760	9
Bradi2g54960	4
Bradi3g31590	4
Bradi1g27481	9
Bradi3g08390	4
Bradi1g60394	7
Bradi3g49280	8
Bradi4g17308	1
Bradi2g51440	9
Bradi2g56190	1
Bradi4g07440	3
Bradi1g37297	8
Bradi2g16960	1
Bradi1g60846	6
Bradi3g53960	1
Bradi3g57620	4
Bradi5g03483	1
Bradi4g09740	8
Bradi3g21670	3
Bradi1g31656	7
Bradi5g19980	4
Bradi1g34770	4
Bradi1g35173	1
Bradi3g41282	1
Bradi1g44942	5
Bradi2g62165	1
Bradi3g10286	7
Bradi3g14990	9
Bradi1g36820	8
Bradi2g06750	4
Bradi3g18754	7
Bradi4g05630	8
Bradi3g17515	4
Bradi4g06275	4
Bradi1g01660	8
Bradi1g68830	4
Bradi1g30656	3
Bradi3g03620	4
Bradi2g12150	8
Bradi2g15307	9
Bradi4g02367	1
Bradi5g01827	7
Bradi1g55560	9
Bradi1g07560	8
Bradi1g21968	1
Bradi1g37010	4
Bradi1g54106	9
Bradi2g53330	9
Bradi3g07860	3
Bradi5g04681	7
Bradi2g48850	4
Bradi2g09720	6
Bradi2g21477	7
Bradi3g03391	9
Bradi5g05150	3
Bradi1g20480	1
Bradi1g17243	8
Bradi1g17090	9
Bradi1g57880	9
Bradi5g21740	4
Bradi3g48490	6
Bradi1g47760	4
Bradi1g17200	4
Bradi3g59237	4
Bradi4g32190	8
Bradi5g08907	8
Bradi3g39622	8
Bradi2g38999	5
Bradi1g36420	3
Bradi4g41430	4
Bradi2g07293	4
Bradi4g25022	1
Bradi2g01195	7
Bradi2g18095	8
Bradi1g50120	1
Bradi4g00300	9
Bradi3g29130	9
Bradi4g38610	8
Bradi3g40660	4
Bradi4g29360	7
Bradi1g02270	1
Bradi5g03470	7
Bradi1g53580	3
Bradi1g77867	9
Bradi1g28353	1
Bradi3g02300	8
Bradi3g35820	4
Bradi5g03290	3
Bradi2g47920	7
Bradi5g19130	9
Bradi5g16253	1
Bradi1g07660	1
Bradi2g57680	9
Bradi1g27478	9
Bradi4g08750	1
Bradi3g42869	8
Bradi2g40400	8
Bradi3g30500	3
Bradi3g07750	9
Bradi1g46940	7
Bradi3g36347	9
Bradi1g55620	6
Bradi4g05327	7
Bradi1g52750	8
Bradi3g13570	8
Bradi1g30273	8
Bradi1g67083	7
Bradi3g37595	1
Bradi2g10770	8
Bradi2g34090	8
Bradi3g06800	7
Bradi1g26540	9
Bradi1g31816	1
Bradi2g60070	1
Bradi2g36322	8
Bradi2g44950	8
Bradi2g37377	5
Bradi4g44590	3
Bradi3g30847	3
Bradi4g12050	3
Bradi5g01950	8
Bradi1g07630	9
Bradi2g46665	4
Bradi4g38855	4
Bradi1g21337	7
Bradi3g37140	3
Bradi5g03211	7
Bradi2g53260	1
Bradi4g04360	7
Bradi5g04854	7
Bradi1g14910	4
Bradi2g36012	7
Bradi1g24760	6
Bradi3g34320	4
Bradi4g11420	9
Bradi4g24310	1
Bradi3g26391	3
Bradi4g14630	9
Bradi4g27622	7
Bradi1g77430	4
Bradi4g13813	7
Bradi3g17773	1
Bradi4g35650	7
Bradi1g37870	4
Bradi3g10733	8
Bradi3g22950	6
Bradi2g47610	8
Bradi5g09340	9
Bradi4g28597	7
Bradi5g24227	8
Bradi1g74620	8
Bradi3g49130	1
Bradi3g47010	9
Bradi3g30300	8
Bradi3g46480	5
Bradi4g13670	3
Bradi4g16093	1
Bradi5g23760	1
Bradi1g00980	4
Bradi1g09930	8
Bradi3g48540	3
Bradi2g02370	8
Bradi2g35760	8
Bradi1g77637	8
Bradi4g03736	7
Bradi4g30100	4
Bradi1g50840	8
Bradi1g52470	3
Bradi5g26610	5
Bradi3g30430	7
Bradi1g30835	1
Bradi3g15087	4
Bradi2g04020	8
Bradi2g14790	9
Bradi2g56470	8
Bradi1g09940	8
Bradi3g38881	3
Bradi3g47605	7
Bradi1g61540	8
Bradi3g55890	9
Bradi1g37890	4
Bradi1g26530	9
Bradi3g35726	4
Bradi1g74420	6
Bradi2g17872	7
Bradi3g13487	8
Bradi4g02380	4
Bradi4g37210	9
Bradi2g36480	9
Bradi4g01950	7
Bradi3g41510	1
Bradi2g59950	9
Bradi4g10290	1
Bradi3g08710	7
Bradi1g60390	4
Bradi4g43061	8
Bradi5g02218	7
Bradi1g21330	9
Bradi2g21280	9
Bradi1g34717	1
Bradi1g38325	9
Bradi1g42030	3
Bradi1g43080	9
Bradi2g04537	7
Bradi2g27436	1
Bradi4g30210	3
Bradi5g10676	7
Bradi2g33170	3
Bradi3g13940	8
Bradi3g21220	1
Bradi1g30110	1
Bradi2g08990	8
Bradi5g13663	1
Bradi2g16750	1
Bradi4g39020	9
Bradi1g36260	8
Bradi2g45870	4
Bradi5g12198	7
Bradi4g10460	1
Bradi1g50390	3
Bradi1g26810	9
Bradi4g32730	3
Bradi1g52665	1
Bradi4g31417	7
Bradi2g08030	8
Bradi4g16099	4
Bradi4g07130	8
Bradi2g59530	4
Bradi5g19920	8
Bradi1g44020	9
Bradi4g39870	3
Bradi5g20540	8
Bradi5g22590	9
Bradi1g11986	8
Bradi2g19221	7
Bradi1g60750	8
Bradi2g01190	7
Bradi2g54680	8
Bradi1g63020	3
Bradi3g28304	4
Bradi2g34130	4
Bradi4g34207	1
Bradi1g05480	2
Bradi4g37845	1
Bradi5g16380	8
Bradi2g53200	9
Bradi4g29290	9
Bradi2g22670	4
Bradi2g62170	4
Bradi1g63080	4
Bradi3g34400	8
Bradi2g20380	8
Bradi2g40790	8
Bradi3g46060	4
Bradi1g02056	7
Bradi3g05253	7
Bradi4g00332	7
Bradi1g16580	8
Bradi1g60960	9
Bradi1g18793	1
Bradi3g19087	9
Bradi3g47417	4
Bradi1g40178	1
Bradi1g18510	1
Bradi2g20110	9
Bradi1g50968	1
Bradi1g21095	2
Bradi4g28286	7
Bradi4g00530	9
Bradi2g51716	8
Bradi3g05305	3
Bradi3g16660	1
Bradi1g57050	4
Bradi3g45281	3
Bradi2g60331	4
Bradi3g20810	8
Bradi1g28580	3
Bradi1g25913	1
Bradi1g65440	9
Bradi3g45900	1
Bradi1g22001	8
Bradi3g14658	8
Bradi3g53113	4
Bradi4g23360	1
Bradi1g11876	1
Bradi1g13430	1
Bradi3g04930	8
Bradi2g55150	8
Bradi5g23150	3
Bradi5g15000	4
Bradi3g05760	4
Bradi2g48680	8
Bradi4g43970	1
Bradi1g15610	8
Bradi1g21097	4
Bradi2g44360	8
Bradi4g41320	8
Bradi2g03701	7
Bradi4g17182	7
Bradi3g09150	1
Bradi5g14630	3
Bradi1g50826	8
Bradi1g36160	4
Bradi3g34720	1
Bradi5g15880	1
Bradi1g12377	1
Bradi1g10860	8
Bradi1g44630	9
Bradi3g49467	1
Bradi5g18090	4
Bradi3g16515	6
Bradi3g48180	6
Bradi1g36490	6
Bradi1g37667	6
Bradi4g15010	6
Bradi1g75950	6
Bradi1g41115	2
Bradi1g61560	6
Bradi1g08421	6
Bradi4g40740	6
Bradi2g44852	6
Bradi5g19110	9
Bradi1g26260	6
Bradi3g55730	6
Bradi1g29680	6
Bradi3g57470	2
Bradi3g45180	6
Bradi2g05611	6
Bradi3g34820	9
Bradi3g27000	6
Bradi2g08100	9
Bradi1g69530	6
Bradi4g40727	9
Bradi2g41060	9
Bradi2g01310	6
Bradi4g00580	6
Bradi1g06030	9
Bradi5g11750	6
Bradi2g12030	6
Bradi2g03610	2
Bradi5g14280	6
Bradi1g43710	9
Bradi4g43510	9
Bradi2g46502	6
Bradi4g16740	6
Bradi4g11400	9
Bradi3g32880	4
Bradi2g11350	9
Bradi3g59430	9
Bradi3g48230	6
Bradi5g23027	9
Bradi4g26354	6
Bradi4g25900	6
Bradi4g13920	6
Bradi2g25417	6
Bradi3g13633	6
Bradi1g01800	9
Bradi4g42517	9
Bradi3g01440	9
Bradi1g41957	2
Bradi2g13610	6
Bradi4g19720	2
Bradi2g25550	6
Bradi5g10967	2
Bradi1g14983	6
Bradi4g07100	2
Bradi3g51757	6
Bradi3g18945	6
Bradi5g10920	6
Bradi4g35950	6
Bradi3g36600	9
Bradi2g06590	6
Bradi4g00877	6
Bradi1g60600	9
Bradi3g16670	6
Bradi2g12830	6
Bradi3g33040	9
Bradi2g61500	9
Bradi2g25470	6
Bradi4g40570	6
Bradi3g16640	9
Bradi1g17450	9
Bradi1g25517	6
Bradi3g13670	6
Bradi3g06597	6
Bradi2g16005	6
Bradi1g69330	6
Bradi5g17170	6
Bradi2g35780	2
Bradi3g60050	2
Bradi1g34600	9
Bradi1g73710	6
Bradi2g01102	6
Bradi4g43450	6
Bradi4g43900	9
Bradi1g76330	6
Bradi1g71160	9
Bradi1g35220	9
Bradi3g15490	6
Bradi4g30130	6
Bradi4g34410	9
Bradi4g42540	6
Bradi4g44410	9
Bradi3g17900	6
Bradi3g43070	2
Bradi3g60730	9
Bradi5g25440	6
Bradi2g32900	6
Bradi1g74350	6
Bradi4g05650	9
Bradi1g49202	6
Bradi3g07150	9
Bradi1g24870	9
Bradi5g26740	6
Bradi2g33450	9
Bradi1g42670	9
Bradi2g39970	2
Bradi4g42240	9
Bradi2g57100	4
Bradi3g15040	2
Bradi5g24630	9
Bradi2g18237	6
Bradi1g62410	6
Bradi3g43150	9
Bradi3g09240	9
Bradi3g52096	6
Bradi4g23800	9
Bradi1g26000	6
Bradi2g06150	9
Bradi3g52190	4
Bradi2g06600	6
Bradi2g31510	6
Bradi1g25860	9
Bradi4g41030	6
Bradi1g19010	6
Bradi2g44170	6
Bradi2g57900	6
Bradi2g26090	4
Bradi5g02176	4
Bradi1g01870	6
Bradi2g38247	6
Bradi1g09840	6
Bradi1g71370	9
Bradi1g66590	6
Bradi2g49380	6
Bradi3g52505	6
Bradi2g24680	9
Bradi5g23077	6
Bradi3g51960	9
Bradi4g33727	2
Bradi1g24590	6
Bradi2g10880	6
Bradi1g09431	9
Bradi4g23290	2
Bradi2g26740	6
Bradi1g39167	9
Bradi4g08640	4
Bradi1g78710	6
Bradi3g30590	6
Bradi1g75610	6
Bradi3g33030	9
Bradi1g75087	9
Bradi3g56490	4
Bradi1g07550	4
Bradi2g25600	9
Bradi1g17810	9
Bradi3g39800	6
Bradi2g04310	6
Bradi5g19320	9
Bradi2g60170	2
Bradi4g07380	6
Bradi1g26710	9
Bradi4g24967	2
Bradi1g77320	2
Bradi5g08840	6
Bradi1g48070	9
Bradi1g24747	6
Bradi3g55440	4
Bradi3g56990	4
Bradi3g09350	9
Bradi4g43580	9
Bradi3g02710	9
Bradi2g25570	6
Bradi2g05620	9
Bradi1g23450	6
Bradi1g19250	9
Bradi3g33341	6
Bradi2g46093	9
Bradi1g73120	4
Bradi4g39780	6
Bradi2g53470	6
Bradi1g77840	2
Bradi1g57000	6
Bradi3g10600	6
Bradi2g45490	2
Bradi2g58440	9
Bradi3g57740	2
Bradi2g03280	9
Bradi1g48870	9
Bradi3g18850	9
Bradi1g67730	6
Bradi2g47330	6
Bradi4g26342	9
Bradi1g26760	9
Bradi3g22786	6
Bradi2g17400	6
Bradi4g13626	9
Bradi4g11892	2
Bradi2g17540	5
Bradi3g08660	6
Bradi5g18040	9
Bradi1g69400	2
Bradi2g55450	9
Bradi1g54060	6
Bradi3g59710	9
Bradi3g02310	9
Bradi1g19840	6
Bradi5g27467	6
Bradi2g45700	4
Bradi3g45530	4
Bradi3g06487	6
Bradi5g03380	9
Bradi1g77940	6
Bradi2g54670	6
Bradi3g49260	9
Bradi5g05166	9
Bradi5g27602	9
Bradi3g39380	9
Bradi2g33150	6
Bradi2g50070	2
Bradi5g03640	9
Bradi1g45580	6
Bradi4g36850	6
Bradi1g56930	8
Bradi2g59290	6
Bradi3g14630	2
Bradi2g05270	6
Bradi1g26790	9
Bradi3g61060	9
Bradi3g41507	9
Bradi3g52690	9
Bradi1g03840	9
Bradi3g30510	6
Bradi2g60409	2
Bradi3g22694	6
Bradi5g19787	6
Bradi4g08410	6
Bradi3g28677	6
Bradi5g08790	6
Bradi3g16645	4
Bradi3g10770	9
Bradi1g15880	9
Bradi1g17410	6
Bradi4g41373	4
Bradi4g20500	9
Bradi2g25887	9
Bradi3g14150	6
Bradi2g12727	6
Bradi2g07290	4
Bradi1g13240	6
Bradi1g54400	4
Bradi2g58350	9
Bradi3g30154	4
Bradi2g37150	6
Bradi1g00700	6
Bradi4g05620	9
Bradi1g22050	2
Bradi3g16130	9
Bradi3g36330	9
Bradi5g01060	6
Bradi4g02192	6
Bradi3g28302	2
Bradi3g45930	6
Bradi3g30220	6
Bradi3g57680	9
Bradi3g59440	9
Bradi1g03470	4
Bradi2g02320	9
Bradi2g47130	9
Bradi3g10412	6
Bradi5g16120	6
Bradi3g17326	9
Bradi2g43880	9
Bradi1g64507	9
Bradi4g29730	2
Bradi5g12330	9
Bradi2g40537	4
Bradi5g09530	9
Bradi3g14800	8
Bradi3g14140	6
Bradi4g34430	8
Bradi5g23066	6
Bradi4g31380	9
Bradi1g12130	9
Bradi1g10540	9
Bradi2g23520	6
Bradi4g11590	9
Bradi4g08097	9
Bradi3g16110	9
Bradi2g00381	9
Bradi1g27400	2
Bradi3g03080	6
Bradi3g05660	6
Bradi3g43180	9
Bradi4g43460	6
Bradi1g06160	9
Bradi1g01985	6
Bradi3g31960	9
Bradi4g31590	6
Bradi2g18920	9
Bradi1g76870	9
Bradi1g25552	5
Bradi3g45840	8
Bradi3g36887	9
Bradi2g07180	9
Bradi2g05050	9
Bradi3g56270	9
Bradi5g14580	9
Bradi3g24760	9
Bradi2g35080	6
Bradi3g25093	9
Bradi2g06416	6
Bradi4g24367	8
Bradi4g02220	9
Bradi1g37090	9
Bradi1g61690	6
Bradi3g07110	6
Bradi3g42400	4
Bradi4g14020	9
Bradi2g26240	9
Bradi1g58240	4
Bradi1g75290	4
Bradi3g36217	6
Bradi4g13960	9
Bradi5g14910	6
Bradi5g25500	4
Bradi1g37304	6
Bradi3g22820	6
Bradi2g56910	2
Bradi2g54010	6
Bradi5g23460	6
Bradi5g16100	6
Bradi4g39260	9
Bradi5g07760	9
Bradi2g19620	6
Bradi3g06350	9
Bradi3g39140	6
Bradi5g11590	6
Bradi2g27370	4
Bradi2g55250	6
Bradi3g15430	2
Bradi2g49870	4
Bradi2g49930	4
Bradi1g51200	9
Bradi4g20520	2
Bradi2g13075	2
Bradi4g11320	6
Bradi1g50040	9
Bradi1g54630	2
Bradi5g02460	6
Bradi1g04810	9
Bradi1g10110	9
Bradi1g59730	9
Bradi4g40230	4
Bradi1g56580	9
Bradi1g74590	9
Bradi2g32230	8
Bradi4g24650	8
Bradi1g17800	4
Bradi3g59390	9
Bradi1g20780	9
Bradi3g09597	9
Bradi2g15317	8
Bradi3g14710	4
Bradi3g03450	6
Bradi1g02273	4
Bradi2g41880	9
Bradi2g01520	9
Bradi4g32480	2
Bradi1g37600	2
Bradi2g19640	8
Bradi2g41510	2
Bradi1g04620	8
Bradi1g78230	9
Bradi5g19380	2
Bradi4g16350	6
Bradi1g36990	9
Bradi2g07810	9
Bradi3g61220	2
Bradi3g27670	4
Bradi1g20586	4
Bradi3g53650	6
Bradi4g44530	9
Bradi2g37487	4
Bradi1g54440	4
Bradi5g11640	6
Bradi3g56020	9
Bradi1g65530	9
Bradi4g33660	4
Bradi2g08910	9
Bradi1g47017	2
Bradi2g15877	6
Bradi2g48940	9
Bradi3g34850	6
Bradi1g20910	9
Bradi1g14877	2
Bradi1g25117	9
Bradi5g21370	9
Bradi4g23367	9
Bradi5g16860	9
Bradi3g04080	9
Bradi4g23967	6
Bradi2g60441	6
Bradi1g08236	6
Bradi2g62067	4
Bradi1g19470	6
Bradi4g12070	9
Bradi1g26393	2
Bradi3g07040	2
Bradi2g23540	2
Bradi5g12395	9
Bradi1g15560	9
Bradi3g41987	8
Bradi5g13340	2
Bradi3g15500	9
Bradi5g18020	6
Bradi2g56650	9
Bradi1g59870	9
Bradi3g43360	4
Bradi3g60870	4
Bradi5g12510	2
Bradi5g22950	6
Bradi2g03241	8
Bradi1g76465	8
Bradi2g53780	9
Bradi3g14480	4
Bradi1g57750	9
Bradi1g26350	9
Bradi2g54410	2
Bradi2g25850	6
Bradi1g72350	9
Bradi4g02201	6
Bradi3g01920	9
Bradi5g10757	8
Bradi3g13307	6
Bradi1g47580	8
Bradi2g46750	6
Bradi2g00810	9
Bradi1g48790	6
Bradi3g45270	6
Bradi2g40970	9
Bradi4g16560	6
Bradi1g18407	9
Bradi4g06827	4
Bradi1g47067	2
Bradi2g55430	6
Bradi5g00925	6
Bradi1g06890	9
Bradi5g24460	4
Bradi5g21960	6
Bradi1g75740	8
Bradi1g51780	6
Bradi1g58746	9
Bradi4g13280	6
Bradi1g45930	8
Bradi2g39300	4
Bradi5g10737	4
Bradi1g33690	2
Bradi4g38140	6
Bradi4g44838	9
Bradi1g67270	9
Bradi1g55120	9
Bradi3g49620	9
Bradi3g44600	2
Bradi1g32800	2
Bradi1g76840	4
Bradi3g37300	9
Bradi2g61850	4
Bradi5g24640	8
Bradi1g12710	6
Bradi3g28350	6
Bradi2g20447	9
Bradi3g38040	8
Bradi2g45070	9
Bradi1g09400	2
Bradi1g46195	8
Bradi5g21880	4
Bradi2g36237	2
Bradi2g49387	6
Bradi1g27130	6
Bradi1g45540	4
Bradi1g18815	8
Bradi3g16307	6
Bradi3g49915	6
Bradi3g05680	2
Bradi1g23440	6
Bradi2g60340	2
Bradi5g11350	8
Bradi1g37826	9
Bradi1g70380	8
Bradi5g17650	9
Bradi2g39265	8
Bradi5g14240	6
Bradi3g22340	9
Bradi4g13250	6
Bradi1g24835	4
Bradi2g54920	9
Bradi1g18050	9
Bradi3g15495	6
Bradi3g46610	2
Bradi3g49085	5
Bradi3g34980	9
Bradi1g61930	2
Bradi2g57310	9
Bradi1g23110	9
Bradi4g17217	8
Bradi5g15360	6
Bradi2g14250	6
Bradi1g66533	4
Bradi2g37310	8
Bradi5g21770	9
Bradi3g05560	8
Bradi4g14937	9
Bradi1g21610	9
Bradi1g68300	2
Bradi4g25880	6
Bradi2g06740	9
Bradi1g52200	4
Bradi3g48150	2
Bradi1g06340	6
Bradi4g04000	9
Bradi3g19940	4
Bradi1g35760	4
Bradi2g01540	4
Bradi2g56640	6
Bradi5g15180	2
Bradi1g60970	9
Bradi1g11530	4
Bradi1g12067	4
Bradi5g10952	4
Bradi4g29246	8
Bradi3g14690	2
Bradi3g06260	9
Bradi3g48670	8
Bradi1g33070	8
Bradi2g09470	2
Bradi1g44040	6
Bradi5g22820	4
Bradi4g01130	8
Bradi2g57927	6
Bradi4g18307	8
Bradi4g30950	8
Bradi4g26500	9
Bradi1g16000	4
Bradi4g37570	6
Bradi2g44300	9
Bradi3g09810	6
Bradi1g06560	9
Bradi2g46800	2
Bradi5g20030	2
Bradi1g31700	4
Bradi2g01077	4
Bradi2g20800	9
Bradi1g62880	8
Bradi5g20315	4
Bradi5g15130	9
Bradi3g47350	8
Bradi3g57380	9
Bradi1g10480	8
Bradi2g62315	9
Bradi3g10934	8
Bradi1g71820	2
Bradi3g55200	8
Bradi3g21350	9
Bradi2g56760	6
Bradi2g36297	6
Bradi1g67600	9
Bradi3g46070	6
Bradi1g15930	9
Bradi5g14560	4
Bradi1g56137	2
Bradi2g13010	6
Bradi5g03390	6
Bradi3g17090	9
Bradi2g51480	8
Bradi3g01880	9
Bradi2g01497	6
Bradi4g01240	4
Bradi3g48810	2
Bradi1g78570	4
Bradi3g47041	8
Bradi1g23390	9
Bradi2g57567	9
Bradi2g46660	4
Bradi5g01240	9
Bradi1g61890	2
Bradi3g49700	4
Bradi2g01920	6
Bradi1g63690	8
Bradi5g18939	6
Bradi2g17610	6
Bradi3g34600	6
Bradi3g32040	9
Bradi3g56550	8
Bradi4g17304	4
Bradi1g02150	8
Bradi2g41070	6
Bradi2g34837	4
Bradi3g60470	9
Bradi3g09690	2
Bradi4g32941	6
Bradi3g35540	9
Bradi1g24090	2
Bradi4g11850	9
Bradi3g56190	8
Bradi3g05750	9
Bradi4g22220	8
Bradi1g34240	9
Bradi3g27407	9
Bradi3g39927	6
Bradi2g47790	9
Bradi2g48320	2
Bradi4g45360	8
Bradi1g77160	4
Bradi2g05730	2
Bradi2g06260	6
Bradi4g06420	6
Bradi1g30640	6
Bradi2g14567	2
Bradi3g34227	4
Bradi1g30330	4
Bradi5g16257	4
Bradi3g16530	9
Bradi4g41840	6
Bradi1g60720	8
Bradi2g26160	4
Bradi2g11591	6
Bradi1g69120	6
Bradi2g59240	2
Bradi4g11390	9
Bradi1g26800	8
Bradi2g40870	6
Bradi1g01310	8
Bradi1g63300	9
Bradi3g14330	8
Bradi2g53980	2
Bradi1g50897	8
Bradi1g73690	4
Bradi2g47550	6
Bradi2g12850	6
Bradi1g35530	8
Bradi3g33880	8
Bradi1g62860	4
Bradi2g16660	6
Bradi1g35210	9
Bradi1g49010	8
Bradi1g14050	9
Bradi1g33860	6
Bradi2g13767	4
Bradi1g34145	9
Bradi3g36260	6
Bradi1g58350	8
Bradi5g18830	6
Bradi1g12620	6
Bradi5g12995	6
Bradi4g11441	4
Bradi2g57451	9
Bradi1g01420	9
Bradi3g07260	2
Bradi2g51670	2
Bradi2g52510	8
Bradi1g33810	4
Bradi1g20750	2
Bradi1g21372	4
Bradi3g06840	2
Bradi2g33500	8
Bradi4g35342	6
Bradi2g16396	8
Bradi1g14020	4
Bradi5g26490	8
Bradi3g59130	8
Bradi5g08622	2
Bradi3g35197	2
Bradi2g47480	6
Bradi3g17550	4
Bradi2g58420	4
Bradi2g34310	8
Bradi4g07902	6
Bradi2g39285	4
Bradi1g43417	6
Bradi4g45220	6
Bradi2g22893	4
Bradi5g04760	9
Bradi4g44460	4
Bradi3g57400	8
Bradi1g27290	6
Bradi5g21658	4
Bradi4g41580	4
Bradi2g38530	4
Bradi3g34077	9
Bradi2g27410	9
Bradi5g27350	6
Bradi1g41830	8
Bradi2g50540	4
Bradi5g10040	2
Bradi1g54990	8
Bradi4g31930	9
Bradi2g19160	8
Bradi2g47710	6
Bradi4g31040	6
Bradi3g60430	9
Bradi1g30160	6
Bradi2g39280	4
Bradi1g76290	6
Bradi1g17680	6
Bradi1g12650	2
Bradi1g67440	9
Bradi1g77460	9
Bradi1g60756	9
Bradi1g01610	2
Bradi1g22680	4
Bradi3g43587	4
Bradi2g35860	2
Bradi3g05755	9
Bradi3g43500	4
Bradi1g07133	9
Bradi4g42187	8
Bradi2g50480	9
Bradi4g01830	9
Bradi4g36517	9
Bradi1g43220	2
Bradi1g12740	4
Bradi5g08760	9
Bradi1g71120	8
Bradi5g22090	2
Bradi3g42000	6
Bradi4g40580	8
Bradi3g09680	4
Bradi1g59880	6
Bradi3g49590	8
Bradi2g01910	9
Bradi3g08160	8
Bradi4g36968	6
Bradi2g56320	2
Bradi1g59860	9
Bradi1g37100	6
Bradi1g51320	8
Bradi4g42817	4
Bradi1g36130	2
Bradi3g34517	8
Bradi1g37480	9
Bradi5g12960	6
Bradi1g09260	8
Bradi5g09610	6
Bradi3g36120	9
Bradi3g19077	6
Bradi4g32270	9
Bradi3g38770	4
Bradi1g69637	6
Bradi1g68807	9
Bradi3g32086	6
Bradi5g10357	6
Bradi1g43950	8
Bradi2g58290	4
Bradi4g39540	4
Bradi3g08620	4
Bradi3g22050	2
Bradi1g11800	5
Bradi1g17850	6
Bradi1g06235	4
Bradi2g07840	8
Bradi2g01280	2
Bradi4g31110	2
Bradi2g17660	8
Bradi2g26690	4
Bradi1g64160	8
Bradi1g60910	9
Bradi1g52080	9
Bradi3g17060	2
Bradi1g72457	6
Bradi3g02730	6
Bradi4g36390	4
Bradi5g19610	9
Bradi1g08357	4
Bradi5g16400	9
Bradi2g54740	6
Bradi5g14640	9
Bradi3g54140	4
Bradi4g24140	4
Bradi1g21900	4
Bradi4g33850	4
Bradi3g07630	9
Bradi1g11350	9
Bradi1g34560	8
Bradi4g14090	2
Bradi3g53920	9
Bradi2g04230	8
Bradi2g05880	6
Bradi2g02350	9
Bradi1g22361	8
Bradi2g43660	4
Bradi1g68430	8
Bradi5g04407	9
Bradi1g76470	8
Bradi4g33490	8
Bradi3g56200	4
Bradi1g60890	4
Bradi1g54720	6
Bradi5g20770	4
Bradi1g02210	5
Bradi1g64920	4
Bradi5g21383	6
Bradi4g16510	8
Bradi5g20177	9
Bradi4g12160	9
Bradi4g40760	9
Bradi4g40400	9
Bradi4g12816	4
Bradi1g57120	6
Bradi1g19720	6
Bradi2g47110	8
Bradi1g18370	4
Bradi2g60300	2
Bradi1g59310	8
Bradi3g49570	9
Bradi1g64560	9
Bradi5g18980	9
Bradi1g70350	4
Bradi2g22950	4
Bradi2g12340	4
Bradi5g19640	8
Bradi1g11050	9
Bradi2g60926	9
Bradi3g37690	6
Bradi3g35700	4
Bradi2g11900	4
Bradi2g42040	9
Bradi5g08220	6
Bradi1g12080	4
Bradi2g56260	9
Bradi2g51150	9
Bradi1g18390	9
Bradi4g22266	4
Bradi2g38380	2
Bradi2g62470	8
Bradi3g52560	8
Bradi5g23515	6
Bradi1g69740	2
Bradi5g26060	8
Bradi5g14701	8
Bradi3g03770	9
Bradi1g30468	8
Bradi5g13047	6
Bradi3g37240	9
Bradi3g57130	8
Bradi4g22760	4
Bradi2g52660	9
Bradi2g30423	9
Bradi2g17120	2
Bradi2g28165	6
Bradi3g30160	9
Bradi1g31820	9
Bradi1g29457	9
Bradi4g11920	4
Bradi4g30536	8
Bradi2g60660	9
Bradi5g23158	6
Bradi4g24040	6
Bradi1g67080	9
Bradi5g24760	9
Bradi2g56970	6
Bradi4g41540	2
Bradi2g20710	6
Bradi3g18580	6
Bradi2g18130	2
Bradi3g35430	6
Bradi2g45620	2
Bradi2g31550	2
Bradi3g39400	6
Bradi4g30750	9
Bradi4g15011	9
Bradi5g15010	9
Bradi1g32939	6
Bradi1g56860	9
Bradi4g36945	2
Bradi1g09847	2
Bradi4g34050	2
Bradi4g25120	8
Bradi1g02630	4
Bradi3g18636	9
Bradi1g22440	9
Bradi5g11020	4
Bradi2g19710	4
Bradi4g40155	6
Bradi1g74240	9
Bradi2g36187	4
Bradi3g59167	9
Bradi5g20130	8
Bradi5g00640	2
Bradi3g39450	4
Bradi1g61850	9
Bradi4g09090	2
Bradi1g60762	9
Bradi5g07750	4
Bradi3g44910	2
Bradi1g22750	6
Bradi2g45900	9
Bradi4g29852	2
Bradi3g57763	6
Bradi2g34827	4
Bradi4g38460	6
Bradi3g39980	8
Bradi1g36640	8
Bradi5g00600	8
Bradi3g56250	4
Bradi3g46033	4
Bradi4g35500	8
Bradi4g11580	6
Bradi1g33490	6
Bradi3g14160	4
Bradi3g09770	4
Bradi1g37120	9
Bradi1g01363	9
Bradi3g03290	2
Bradi1g44730	4
Bradi1g78340	8
Bradi4g36170	8
Bradi2g49906	4
Bradi3g10140	4
Bradi1g49130	2
Bradi3g48530	6
Bradi1g09570	1
Bradi3g26147	4
Bradi5g27530	6
Bradi1g07270	2
Bradi5g17230	6
Bradi1g49240	2
Bradi1g33720	9
Bradi1g48292	6
Bradi3g42060	9
Bradi1g73140	4
Bradi5g14600	9
Bradi4g06290	6
Bradi2g31887	4
Bradi2g53320	6
Bradi3g33070	6
Bradi4g22630	8
Bradi1g17140	8
Bradi2g23740	5
Bradi4g32315	5
Bradi4g35040	5
Bradi4g18320	5
Bradi1g39206	3
Bradi3g17101	5
Bradi3g38980	6
Bradi1g75220	5
Bradi4g22175	5
Bradi2g53760	5
Bradi2g34407	5
Bradi3g39177	5
Bradi2g58013	5
Bradi4g22651	5
Bradi2g33858	5
Bradi1g57690	5
Bradi4g28763	5
Bradi1g11465	5
Bradi2g57800	5
Bradi4g24590	5
Bradi1g36530	5
Bradi3g45360	7
Bradi1g72130	7
Bradi5g03651	5
Bradi3g30193	5
Bradi2g12870	5
Bradi2g35767	5
Bradi1g36410	5
Bradi2g09145	5
Bradi3g56670	5
Bradi2g08280	7
Bradi3g35752	5
Bradi2g23175	5
Bradi1g00260	5
Bradi3g30718	5
Bradi3g20106	5
Bradi3g34670	5
Bradi5g27699	5
Bradi1g74270	6
Bradi5g01050	7
Bradi2g02720	5
Bradi3g30110	5
Bradi2g37191	7
Bradi1g57222	5
Bradi4g09794	7
Bradi2g60460	5
Bradi5g00700	5
Bradi4g10590	5
Bradi2g52370	5
Bradi1g68502	7
Bradi1g73890	5
Bradi5g06695	5
Bradi1g63170	2
Bradi3g38006	5
Bradi1g41775	5
Bradi3g53696	5
Bradi5g02920	6
Bradi4g08917	5
Bradi3g23066	5
Bradi2g21060	5
Bradi1g40543	5
Bradi1g04580	5
Bradi1g68887	5
Bradi4g33286	5
Bradi5g01283	5
Bradi3g15783	2
Bradi4g09815	5
Bradi4g41040	6
Bradi3g37486	5
Bradi1g55822	7
Bradi1g68680	5
Bradi1g17160	5
Bradi1g46150	6
Bradi2g11652	5
Bradi1g76617	5
Bradi5g07705	5
Bradi4g35940	6
Bradi1g18540	7
Bradi5g00444	7
Bradi2g36788	7
Bradi3g09740	5
Bradi2g15810	7
Bradi4g21649	5
Bradi1g66130	7
Bradi4g28837	7
Bradi4g42957	5
Bradi2g21186	5
Bradi2g30814	5
Bradi2g31693	5
Bradi3g11170	5
Bradi5g01450	5
Bradi1g28070	7
Bradi2g53425	5
Bradi1g07237	6
Bradi1g19056	5
Bradi4g07510	2
Bradi1g55954	5
Bradi2g11990	5
Bradi2g18767	5
Bradi2g24925	7
Bradi2g58780	3
Bradi3g40759	5
Bradi2g62990	7
Bradi4g10380	5
Bradi2g27260	2
Bradi1g62033	3
Bradi3g27486	7
Bradi2g58160	2
Bradi5g09200	6
Bradi1g23653	5
Bradi1g08517	6
Bradi3g05410	6
Bradi3g47995	5
Bradi3g15457	7
Bradi2g18980	5
Bradi4g35730	5
Bradi4g30290	5
Bradi2g10942	7
